# Supplementary material for: Structure–activity relationship of the cinnamamide family of antibiotic potentiators for methicillin-resistant Staphylococcus aureus (MRSA)
Source: Royal Society of Chemistry journal article supplement (doi:10.1039/c8md00479j), 2018-01-01

## Supporting Information

### Structure-Activity Relationship of the Cinnamamide Family of Antibiotic Potentiators for Methicillin-Resistance *Staphylococcus aureus* (MRSA)

Enrico Speri<sup>a</sup>, Jennifer Fishovitz<sup>a</sup>, and Shahriar Mobashery\*<sup>a</sup>

Department of Chemistry and Biochemistry, University of Notre Dame, Notre Dame, IN 46556. E-mail: mobashery@nd.edu

| Structure                                                                           | Experimental procedure and characterization data                                                                                                                                                                                                                                                                                                                                                                                                                                                                                                                                                                                                                                                                                                                                                                                                                                                                                                                                                                                                                                                                                                                                                                                                                                                                                                                                                                                                                    |
|-------------------------------------------------------------------------------------|---------------------------------------------------------------------------------------------------------------------------------------------------------------------------------------------------------------------------------------------------------------------------------------------------------------------------------------------------------------------------------------------------------------------------------------------------------------------------------------------------------------------------------------------------------------------------------------------------------------------------------------------------------------------------------------------------------------------------------------------------------------------------------------------------------------------------------------------------------------------------------------------------------------------------------------------------------------------------------------------------------------------------------------------------------------------------------------------------------------------------------------------------------------------------------------------------------------------------------------------------------------------------------------------------------------------------------------------------------------------------------------------------------------------------------------------------------------------|
| 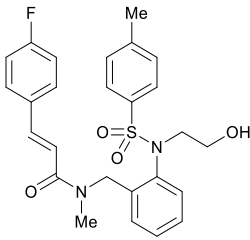   | <p><b>(E)-3-(4-Fluorophenyl)-N-(2-((N-(2-hydroxyethyl)-4-methylphenyl)sulfonamido)benzyl)-N-methylacrylamide (18)</b></p> <p>This compound was prepared by the same procedure for <b>6</b> and was purified with a gradient silica gel column chromatography from EtOAc/Hexane 7:3 to EtOAc/Hexane 1:0 affording white flakes (58 mg, 52%). <sup>1</sup>H NMR (500 MHz, DMSO-<i>d</i><sub>6</sub>) δ ppm 7.82 (dd, <i>J</i>=8.1, 5.9 Hz, 1 H), 7.63 (dd, <i>J</i>=8.2, 5.8 Hz, 1 H), 7.47 - 7.60 (m, 3 H), 7.38 - 7.47 (m, 2.5 H), 7.21 - 7.38 (m, 2 H), 7.17 (q, <i>J</i>=8.5 Hz, 2 H), 7.02 - 7.11 (m, 1 H), 6.90 - 6.99 (m, 0.5 H), 6.55 (dd, <i>J</i>=7.5, 3.1 Hz, 1 H), 4.99 - 5.19 (m, 1 H), 4.92 (dd, <i>J</i>=10.8, 5.4 Hz, 1 H), 4.66 - 4.87 (m, 1 H), 3.77 - 4.01 (m, 1 H), 3.38 - 3.57 (m, 1 H), 3.17 - 3.25 (m, 1 H), 3.12 (s, 1.5 H), 2.98 (s, 1.5 H), 2.41 (s, 3 H). <sup>13</sup>C NMR (100 MHz, DMSO-<i>d</i><sub>6</sub>) δ ppm 166.95, 144.53, 144.36, 141.24, 141.18, 140.07, 139.88, 138.50, 138.27, 135.43, 135.13, 131.06, 130.97, 130.77, 130.69, 130.49, 130.43, 129.62, 129.17, 128.52, 128.44, 128.40, 128.16, 128.05, 127.41, 126.65, 119.03, 118.51, 21.76, 116.55, 116.34, 59.49, 59.28, 54.68, 54.48, 50.34, 47.88, 35.99, 35.22, HRMS (<i>m/z</i>): [M + H]<sup>+</sup>, calcd for C<sub>26</sub>H<sub>29</sub>FN<sub>2</sub>O<sub>4</sub>S, 483.1748; found, 483.1766.</p>                                                          |
|   | <p><b>(E)-N-(2-((N-(2-Hydroxyethyl)-4-methylphenyl)sulfonamido)benzyl)-N-methyl-3-(p-tolyl)acrylamide (19)</b></p> <p>This compound was prepared by the same procedure for <b>6</b> and was purified with a gradient silica gel column chromatography from EtOAc/Hexane 7:3 to EtOAc/Hexane 1:0 affording a white powder (78 mg, 71%). <sup>1</sup>H NMR (500 MHz, DMSO-<i>d</i><sub>6</sub>) δ ppm 7.63 (d, <i>J</i>=8.1 Hz, 1 H), 7.48 - 7.58 (m, 3 H), 7.43 (q, <i>J</i>=8.2 Hz, 3 H), 7.28 - 7.38 (m, 1 H), 7.11 - 7.28 (m, 3.5 H), 7.01 - 7.11 (m, 1 H), 6.87 - 6.98 (m, 0.5 H), 6.55 (dd, <i>J</i>=7.8, 3.67 Hz, 1 H), 5.08 (s, 1 H), 4.87 - 5.02 (m, 1 H), 4.72 - 4.87 (m, 1 H), 3.77 - 3.96 (m, 1 H), 3.38 - 3.53 (m, 1 H), 3.27 - 3.37 (m, 1 H), 3.16 - 3.27 (m, 1 H), 3.12 (s, 1.5 H), 2.98 (s, 1.5 H), 2.36 - 2.45 (m, 3 H), 2.32 (s, 1.5 H), 2.25 (s, 1.5 H). <sup>13</sup>C NMR (100 MHz, DMSO-<i>d</i><sub>6</sub>) δ ppm 167.14, 144.53, 144.35, 142.45, 140.12, 140.09, 139.95, 138.48, 138.26, 135.44, 135.15, 133.08, 132.93, 130.49, 130.43, 130.11, 130.08, 129.61, 129.18, 128.78, 128.53, 128.47, 128.40, 128.14, 128.04, 127.43, 126.60, 117.94, 117.49, 59.49, 59.29, 54.68, 54.48, 50.36, 47.88, 36.00, 35.23, 21.76, 21.68, 21.59. HRMS (<i>m/z</i>): [M + H]<sup>+</sup>, calcd for C<sub>27</sub>H<sub>31</sub>N<sub>2</sub>O<sub>4</sub>S, 479.1999; found, 479.2020.</p>                                                              |
|  | <p><b>(E)-N-Ethyl-N-(2-((N-(2-hydroxyethyl)-4-methylphenyl)sulfonamido)benzyl)-3-(4-(trifluoromethyl)phenyl)acrylamide (20)</b></p> <p>This compound was prepared by the same procedure for <b>6</b> and was purified with a gradient silica gel column chromatography from EtOAc/Hexane 7:3 to EtOAc/Hexane 1:0 affording a white powder (92 mg, 84%). <sup>1</sup>H NMR (500 MHz, DMSO-<i>d</i><sub>6</sub>) δ ppm 7.99 (d, <i>J</i>=7.8 Hz, 1 H), 7.75 (t, <i>J</i>=7.5 Hz, 2 H), 7.58 - 7.70 (m, 2 H), 7.51 (d, <i>J</i>=8.1 Hz, 1 H), 7.54 (d, <i>J</i>=8.1 Hz, 1 H), 7.38 - 7.48 (m, 2.5 H), 7.23 - 7.38 (m, 1 H), 6.98 - 7.22 (m, 2.5 H), 6.53 (t, <i>J</i>=7.8 Hz, 1 H), 5.02 - 5.22 (m, 1 H), 4.77 - 4.99 (m, 2 H), 3.75 - 3.99 (m, 1 H), 3.38 - 3.62 (m, 3 H), 3.05 - 3.26 (m, 1 H), 2.41 (s, 3 H), 1.15 (t, <i>J</i>=7.0 Hz, 1.5 H), 1.11 (t, <i>J</i>=7.0 Hz, 1.5 H). <sup>13</sup>C NMR (100 MHz, DMSO-<i>d</i><sub>6</sub>) δ ppm 166.29, 166.08, 144.54, 144.36, 140.70, 140.66, 140.45, 140.36, 139.91, 139.76, 138.33, 138.26, 135.40, 135.05, 130.48, 130.42, 130.14, 129.86, 129.51, 129.44, 129.07, 128.52, 128.40, 128.36, 128.04, 128.00, 127.65, 126.82, 126.31, 126.28, 123.49, 123.38, 121.95, 121.92, 59.55, 59.29, 54.76, 54.49, 47.89, 45.69, 43.01, 42.16, 21.75, 15.60, 13.57. HRMS (<i>m/z</i>): [M + H]<sup>+</sup>, calcd for C<sub>28</sub>H<sub>30</sub>F<sub>3</sub>N<sub>2</sub>O<sub>4</sub>S, 547.1873; found, 547.1893.</p> |

|                                                                                     |                                                                                                                                                                                                                                                                                                                                                                                                                                                                                                                                                                                                                                                                                                                                                                                                                                                                                                                                                                                                                                                                                                                                                                                                                                                                                                                                                                                                                                                                |
|-------------------------------------------------------------------------------------|----------------------------------------------------------------------------------------------------------------------------------------------------------------------------------------------------------------------------------------------------------------------------------------------------------------------------------------------------------------------------------------------------------------------------------------------------------------------------------------------------------------------------------------------------------------------------------------------------------------------------------------------------------------------------------------------------------------------------------------------------------------------------------------------------------------------------------------------------------------------------------------------------------------------------------------------------------------------------------------------------------------------------------------------------------------------------------------------------------------------------------------------------------------------------------------------------------------------------------------------------------------------------------------------------------------------------------------------------------------------------------------------------------------------------------------------------------------|
| 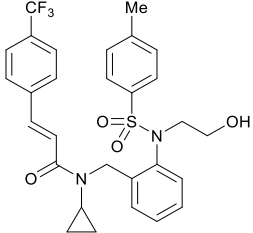   | <p><b>(E)-N-Cyclopropyl-N-(2-((N-(2-hydroxyethyl)-4-methylphenyl)sulfonamido)benzyl)-3-(4-(trifluoromethyl)phenyl)acrylamide (21)</b></p> <p>This compound was prepared by the same procedure for <b>6</b> and was purified with a gradient silica gel column chromatography from EtOAc/Hexane 7:3 to EtOAc/Hexane 1:0 affording a white powder (98 mg, 92%). <sup>1</sup>H NMR (500 MHz, DMSO-<i>d</i><sub>6</sub>) δ ppm 7.93 (m, <i>J</i>=7.8 Hz, 2 H), 7.78 (m, <i>J</i>=8.1 Hz, 1 H), 7.63 - 7.71 (m, 1 H), 7.56 - 7.63 (m, 1 H), 7.52 (d, <i>J</i>=7.8 Hz, 2 H), 7.42 (d, <i>J</i>=8.1 Hz, 2 H), 7.29 (t, <i>J</i>=7.5 Hz, 1 H), 7.15 (t, <i>J</i>=7.4 Hz, 1 H), 7.06 (d, <i>J</i>=7.8 Hz, 1 H), 6.57 (d, <i>J</i>=7.6 Hz, 1 H), 4.83 - 5.03 (m, 2 H), 4.79 (t, <i>J</i>=5.5 Hz, 1 H), 4.47 (s, 1 H), 3.75 - 3.98 (m, 1 H), 3.42 (d, <i>J</i>=5.4 Hz, 2 H), 3.14 - 3.28 (m, 1 H), 2.91 - 3.13 (m, 1 H), 2.41 (s, 3 H), 0.84 - 1.02 (m, 2 H), 0.68 - 0.84 (m, 2 H). <sup>13</sup>C NMR (100 MHz, DMSO-<i>d</i><sub>6</sub>) δ ppm 168.12, 144.36, 140.59, 139.90, 139.77, 137.90, 135.50, 130.43, 129.28, 129.11, 128.43, 128.20, 127.84, 127.11, 126.46, 126.42, 123.34, 65.68, 59.22, 54.48, 47.98, 31.36, 21.76, 9.81, 9.58. HRMS (<i>m/z</i>): [M + H]<sup>+</sup>, calcd for C<sub>29</sub>H<sub>30</sub>F<sub>3</sub>N<sub>2</sub>O<sub>4</sub>S, 559.1873; found, 559.1888.</p>                                                                    |
|    | <p><b>(E)-N-(2-((N-(2-Hydroxyethyl)-4-methylphenyl)sulfonamido)benzyl)-N-isopropyl-3-(4-(trifluoromethyl)phenyl)acrylamide (22)</b></p> <p>This compound was prepared by the same procedure for <b>6</b> and was purified with a gradient silica gel column chromatography from EtOAc/Hexane 7:3 to EtOAc/Hexane 1:0 affording a white powder (142 mg, 39%). <sup>1</sup>H NMR (500 MHz, DMSO-<i>d</i><sub>6</sub>) δ ppm 7.97 (d, <i>J</i>=7.1 Hz, 0.5 H), 7.76 (d, <i>J</i>=7.1 Hz, 0.5 H), 7.59 - 7.70 (m, 4 H), 7.55 (d, <i>J</i>=7.1 Hz, 2.5 H), 7.45 (d, <i>J</i>=7.1 Hz, 2 H), 7.20 - 7.36 (m, 1 H), 7.14 (br. s., 2 H), 6.71 - 6.93 (m, 0.5 H), 6.37 - 6.56 (m, 1 H), 5.13 (br. s., 1.5 H), 4.70 (br. s., 2.5 H), 4.47 (br. s., 1 H), 3.82 - 4.06 (m, 1 H), 3.06 - 3.66 (m, 2 H), 2.42 (br. s., 3 H), 1.16 - 1.31 (m, 1 H), 1.09 - 1.16 (m, 3 H), 0.92 - 1.09 (m, 2 H). <sup>13</sup>C NMR (100 MHz, DMSO-<i>d</i><sub>6</sub>) δ ppm 166.21, 144.56, 144.36, 141.73, 141.13, 140.47, 140.06, 139.82, 137.90, 137.55, 134.89, 130.52, 130.43, 130.10, 129.79, 129.32, 129.25, 128.90, 128.76, 128.53, 128.45, 128.10, 127.88, 127.44, 127.39, 127.20, 126.33, 126.29, 126.25, 122.93, 122.82, 65.68, 59.72, 59.24, 55.01, 54.67, 48.97, 45.62, 43.19, 41.62, 22.06, 21.77, 21.51, 20.50, 20.34. HRMS (<i>m/z</i>): [M + H]<sup>+</sup>, calcd for C<sub>29</sub>H<sub>32</sub>F<sub>3</sub>N<sub>2</sub>O<sub>4</sub>S, 561.2029; found, 561.2058.</p> |
|  | <p><b>(E)-N-(2-(((3-(4-Chlorophenyl)allyl)(isobutyl)amino)methyl)phenyl)-N-(2-hydroxyethyl)-4-methoxybenzenesulfonamide (23)</b></p> <p>This compound was prepared by the same procedure for <b>6</b> and was purified with a gradient silica gel column chromatography from EtOAc/Hexane 7:3 to EtOAc/Hexane 1:0 affording a white powder (134 mg, 35%). <sup>1</sup>H NMR (500 MHz, CDCl<sub>3</sub>) δ ppm 7.53 (d, <i>J</i>=8.8 Hz, 2 H), 7.37 - 7.45 (m, 1 H), 7.30 - 7.37 (m, 2 H), 7.22 - 7.30 (m, 3 H), 7.11 - 7.20 (m, 1 H), 6.95 (m, <i>J</i>=8.8 Hz, 2 H), 6.58 (br. s., 1 H), 6.40 - 6.50 (m, 2 H), 6.30 - 6.40 (m, 1 H), 4.94 (d, <i>J</i>=12.5 Hz, 1 H), 4.01 - 4.18 (m, 1 H), 3.88 (s, 3 H), 3.59 - 3.72 (m, 1 H), 3.38 - 3.55 (m, 1 H), 3.22 - 3.38 (m, 1 H), 3.08 - 3.16 (m, 1 H), 2.91 - 3.07 (m, 2 H), 2.42 - 2.58 (m, 1 H), 2.13 - 2.26 (m, 1 H), 1.95 - 2.10 (m, 1 H), 1.00 (d, <i>J</i>=6.4 Hz, 3 H), 0.94 (d, <i>J</i>=6.9 Hz, 3 H). <sup>13</sup>C NMR (125 MHz, CDCl<sub>3</sub>) δ ppm 21.77, 22.42, 26.09, 55.66, 55.84, 57.17, 57.90, 59.43, 64.10, 114.12, 127.06, 127.56, 127.92, 128.18, 128.60, 128.69, 128.85, 130.81, 132.56, 133.24, 133.95, 135.64, 139.93, 140.03, 163.38. HRMS (<i>m/z</i>): [M + H]<sup>+</sup>, calcd for C<sub>29</sub>H<sub>36</sub>ClN<sub>2</sub>O<sub>4</sub>S, 543.2079; found, 543.2059.</p>                                                                                                    |

|                                                                                     |                                                                                                                                                                                                                                                                                                                                                                                                                                                                                                                                                                                                                                                                                                                                                                                                                                                                                                                                                                                                                                                                                                                                                                                                                                                                                                                                                                                                                                                                                                           |
|-------------------------------------------------------------------------------------|-----------------------------------------------------------------------------------------------------------------------------------------------------------------------------------------------------------------------------------------------------------------------------------------------------------------------------------------------------------------------------------------------------------------------------------------------------------------------------------------------------------------------------------------------------------------------------------------------------------------------------------------------------------------------------------------------------------------------------------------------------------------------------------------------------------------------------------------------------------------------------------------------------------------------------------------------------------------------------------------------------------------------------------------------------------------------------------------------------------------------------------------------------------------------------------------------------------------------------------------------------------------------------------------------------------------------------------------------------------------------------------------------------------------------------------------------------------------------------------------------------------|
| 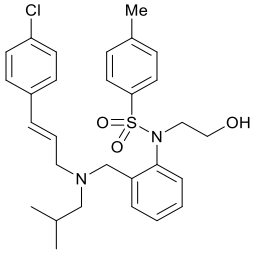   | <p><b>(E)-N-(2-(((3-(4-Chlorophenyl)allyl)(isobutyl)amino)methyl)phenyl)-N-(2-hydroxyethyl)-4-methylbenzenesulfonamide (24)</b></p> <p>This compound was prepared by the same procedure for <b>6</b> and was purified with a gradient silica gel column chromatography from EtOAc/Hexane 1:1 to EtOAc/Hexane 1:0 affording a white powder (82 mg, 31%). <sup>1</sup>H NMR (500 MHz, CDCl<sub>3</sub>) δ ppm 7.49 (d, <i>J</i>=8.1 Hz, 2 H), 7.40 (dd, <i>J</i>=7.6, 1.47 Hz, 1 H), 7.31 - 7.37 (m, 2 H), 7.21 - 7.31 (m, 5 H), 7.15 (td, <i>J</i>=7.6, 1.59 Hz, 1 H), 6.57 (br. s., 1 H), 6.43 - 6.51 (m, 1 H), 6.28 - 6.43 (m, 2 H), 4.84 - 5.07 (m, 1 H), 3.95 - 4.18 (m, 1 H), 3.53 - 3.76 (m, 1 H), 3.36 - 3.52 (m, 1 H), 3.20 - 3.36 (m, 1 H), 3.07 - 3.17 (m, 1 H), 3.00 - 3.06 (m, 1 H), 2.89 - 3.00 (m, 1 H), 2.47 - 2.56 (m, 1 H), 2.45 (s, 3 H), 2.14 - 2.24 (m, 1 H), 1.94 - 2.11 (m, 1 H), 1.00 (d, <i>J</i>=6.6 Hz, 3 H), 0.95 (d, <i>J</i>=6.6 Hz, 3 H). <sup>13</sup>C NMR (125 MHz, CDCl<sub>3</sub>) δ ppm 44.03, 139.98, 139.86, 135.63, 134.02, 133.95, 133.26, 132.59, 129.61, 128.85, 128.77, 128.62, 128.20, 127.92, 127.57, 127.03, 64.10, 59.43, 57.89, 57.17, 55.71, 26.09, 22.42, 21.81, 21.77. HRMS (<i>m/z</i>): [M + H]<sup>+</sup>, calcd for C<sub>29</sub>H<sub>36</sub>ClN<sub>2</sub>O<sub>3</sub>S, 527.2130; found, 527.2136.</p>                                                                                                                                     |
|    | <p><b>(E)-N-(2-((N-(2-Hydroxyethyl)-4-methylphenyl)sulfonamido)benzyl)-3-(4-(trifluoromethyl)phenyl)acrylamide (25)</b></p> <p>This compound was prepared by the same procedure for <b>6</b> and was purified with a gradient silica gel column chromatography from EtOAc/Hexane 7:3 to EtOAc/Hexane 1:0 affording a white powder (40 mg, 37%). <sup>1</sup>H NMR (500 MHz, DMSO-<i>d</i><sub>6</sub>) δ ppm 8.74 (br. s., 1 H), 7.78 (d, <i>J</i>=10.0 Hz, 4 H), 7.46 - 7.62 (m, 3 H), 7.24 - 7.46 (m, 4 H), 7.17 (br. s., 1 H), 6.80 - 7.02 (m, 1 H), 6.56 (d, <i>J</i>=7.1 Hz, 1 H), 4.97 (br. s., 1 H), 4.68 - 4.88 (m, 1 H), 4.38 - 4.61 (m, 1 H), 3.76 - 4.00 (m, 1 H), 3.43 (br. s., 1 H), 3.29 - 3.40 (m, 1 H), 3.10 - 3.29 (m, 1 H), 2.41 (br. s., 3 H). <sup>13</sup>C NMR (100 MHz, DMSO-<i>d</i><sub>6</sub>) δ ppm 165.60, 144.36, 141.33, 139.67, 138.21, 137.97, 135.38, 130.42, 130.13, 129.82, 129.16, 128.93, 128.88, 128.38, 128.21, 28.03, 126.50, 126.47, 126.16, 125.43, 123.46, 59.15, 54.39, 39.44, 21.76. HRMS (<i>m/z</i>): [M + H]<sup>+</sup>, calcd for C<sub>26</sub>H<sub>26</sub>F<sub>3</sub>N<sub>2</sub>O<sub>4</sub>S, 519.1565; found, 519.158.</p>                                                                                                                                                                                                                                                                                                                  |
|  | <p><b>(E)-3-(2,4-Dichlorophenyl)-N-(2-((N-(2-hydroxyethyl)-4-methylphenyl)sulfonamido)benzyl)-N-methylacrylamide (26)</b></p> <p>This compound was prepared by the same procedure for <b>6</b> and was purified with a gradient silica gel column chromatography from EtOAc/Hexane 1:1 to EtOAc/Hexane 7:3 affording a white powder (71 mg, 67%). <sup>1</sup>H NMR (500 MHz, DMSO-<i>d</i><sub>6</sub>) δ ppm 8.09 (d, <i>J</i>=8.6 Hz, 0.5 H), 7.77 - 7.87 (m, 1 H), 7.74 (d, <i>J</i>=8.6 Hz, 0.5 H), 7.71 (d, <i>J</i>=2.2 Hz, 0.5 H), 7.66 (d, <i>J</i>=2.0 Hz, 0.5 H), 7.46 - 7.56 (m, 3 H), 7.39 - 7.46 (m, 2 H), 7.25 - 7.39 (m, 2 H), 7.01 - 7.25 (m, 3 H), 6.55 (t, <i>J</i>=7.1 Hz, 1 H), 5.08 - 5.20 (m, 1 H), 4.99 - 5.08 (m, 1 H), 4.88 - 4.97 (m, 1 H), 4.74 - 4.88 (m, 1 H), 3.77 - 3.93 (m, 1 H), 3.39 - 3.52 (m, 1 H), 3.25 - 3.39 (m, 1 H), 3.16 - 3.25 (m, 1 H), 3.13 (s, 1.5 H), 2.98 (s, 1.5 H), 2.41 (s, 3 H). <sup>13</sup>C NMR (125 MHz, DMSO-<i>d</i><sub>6</sub>) δ ppm 166.40, 166.38, 144.53, 144.36, 139.87, 139.67, 138.54, 138.27, 136.28, 36.13, 135.40, 135.36, 135.31, 135.08, 134.91, 134.91, 132.61, 132.47, 130.48, 130.43, 130.27, 130.03, 129.72, 129.65, 129.21, 128.52, 128.47, 128.40, 128.17, 128.11, 127.41, 126.76, 122.92, 122.46, 59.46, 59.29, 54.66, 54.49, 50.34, 48.00, 36.01, 35.24, 21.76. HRMS (<i>m/z</i>): [M + H]<sup>+</sup>, calcd for C<sub>26</sub>H<sub>27</sub>Cl<sub>2</sub>N<sub>2</sub>O<sub>4</sub>S, 533.1063; found, 533.1085.</p> |

|  |                                                                                                                                                                                                                                                                                                                                                                                                                                                                                                                                                                                                                                                                                                                                                                                                                                                                                                                                                                                                                                                                                                                                                                                                                                                                                                                                                                                                                                                                                                                                            |
|--|--------------------------------------------------------------------------------------------------------------------------------------------------------------------------------------------------------------------------------------------------------------------------------------------------------------------------------------------------------------------------------------------------------------------------------------------------------------------------------------------------------------------------------------------------------------------------------------------------------------------------------------------------------------------------------------------------------------------------------------------------------------------------------------------------------------------------------------------------------------------------------------------------------------------------------------------------------------------------------------------------------------------------------------------------------------------------------------------------------------------------------------------------------------------------------------------------------------------------------------------------------------------------------------------------------------------------------------------------------------------------------------------------------------------------------------------------------------------------------------------------------------------------------------------|
|  | <p><b>(E)-3-(3,4-Dichlorophenyl)-N-(2-((N-(2-hydroxyethyl)-4-methylphenyl)sulfonamido)benzyl)-N-methylacrylamide (27)</b></p> <p>This compound was prepared by the same procedure for <b>6</b> and was purified with a gradient silica gel column chromatography from EtOAc/Hexane 7:3 to EtOAc/Hexane 1:0 affording a white powder (190 mg, 69%). <sup>1</sup>H NMR (400 MHz, DMSO-<i>d</i><sub>6</sub>) δ ppm 8.16 (br. s., 0.5 H), 7.94 (br. s., 0.5 H), 7.77 (d, <i>J</i>=7.6 Hz, 0.5 H), 7.69 (d, <i>J</i>=8.1 Hz, 0.5 H), 7.41 - 7.65 (m, 6.5 H), 7.28 - 7.40 (m, 1 H), 7.15 - 7.26 (m, 1 H), 6.95 - 7.15 (m, 1.5 H), 6.55 (t, <i>J</i>=8.7 Hz, 1 H), 5.10 (br. s., 1 H), 4.88 - 5.00 (m, 1 H), 4.68 - 4.88 (m, 1 H), 3.79 - 3.98 (m, 1 H), 3.39 - 3.57 (m, 1 H), 3.18 - 3.27 (m, 1 H), 3.14 (s, 1.5 H), 3.00 (s, 1.5 H), 2.43 (s, 3 H). <sup>13</sup>C NMR (100 MHz, DMSO-<i>d</i><sub>6</sub>) δ ppm 166.39, 166.33, 144.35, 144.15, 139.84, 139.56, 139.52, 138.26, 137.90, 136.54, 136.33, 135.10, 134.75, 132.22, 132.20, 132.14, 132.11, 131.37, 131.35, 130.23, 130.22, 130.05, 129.68, 129.43, 128.96, 128.91, 128.66, 128.30, 128.26, 128.17, 127.89, 127.13, 126.48, 121.27, 120.74, 59.14, 59.03, 54.39, 54.23, 50.12, 47.66, 35.75, 35.13, 21.55. HRMS (<i>m/z</i>): [M + H]<sup>+</sup>, calcd for C<sub>26</sub>H<sub>27</sub>Cl<sub>2</sub>N<sub>2</sub>O<sub>4</sub>S, 533.1063; found, 533.1067.</p>                                                                                                                |
|  | <p><b>(E)-N-(2-((N-(2-Hydroxyethyl)-4-isopropylphenyl)sulfonamido)benzyl)-N-methyl-3-(4-(trifluoromethyl)phenyl)acrylamide (28)</b></p> <p>This compound was prepared by the same procedure for <b>12</b> and was purified with a gradient silica gel column chromatography from EtOAc/Hexane 7:3 to EtOAc/Hexane 1:0 affording white powder (81 mg, 76%). <sup>1</sup>H NMR (500 MHz, DMSO-<i>d</i><sub>6</sub>) δ ppm 7.98 (d, <i>J</i>=8.1 Hz, 1 H), 7.78 (dd, <i>J</i>=11.5, 8.3 Hz, 2 H), 7.52 - 7.72 (m, 4 H), 7.43 - 7.52 (m, 2.5 H), 7.27 - 7.39 (m, 1 H), 7.13 (s, 2.5 H), 6.57 (dd, <i>J</i>=7.2, 5.8 Hz, 1 H), 5.11 - 5.21 (m, 0.5 H), 5.00 - 5.09 (m, 0.5 H), 4.87 - 4.99 (m, 1 H), 4.75 - 4.87 (m, 1 H), 3.73 - 3.96 (m, 1 H), 3.40 - 3.57 (m, 1 H), 3.18 - 3.28 (m, 1 H), 3.13 (s, 1.5 H), 2.95 - 3.08 (m, 2.5 H), 1.09 - 1.32 (m, 6 H). <sup>13</sup>C NMR (100 MHz, DMSO-<i>d</i><sub>6</sub>) δ ppm 166.63, 166.60, 154.95, 154.80, 140.68, 140.55, 139.93, 139.69, 138.54, 138.32, 135.80, 135.50, 129.63, 129.42, 129.20, 129.15, 128.70, 128.56, 128.52, 128.26, 128.10, 127.94, 127.88, 127.38, 126.67, 126.33, 126.28, 126.25, 122.17, 121.58, 59.51, 59.32, 54.65, 54.46, 50.36, 47.91, 36.01, 35.23, 34.10, 24.21, 24.18, 24.08. HRMS (<i>m/z</i>): [M + H]<sup>+</sup>, calcd for C<sub>29</sub>H<sub>32</sub>F<sub>3</sub>N<sub>2</sub>O<sub>4</sub>S, 561.2029; found, 561.2007.</p>                                                                                                                            |
|  | <p><b>(E)-N-(2-((N-(2-Hydroxyethyl)-4-nitrophenyl)sulfonamido)benzyl)-N-methyl-3-(4-(trifluoromethyl)phenyl)acrylamide (29)</b></p> <p>This compound was prepared by the same procedure for <b>12</b> and was purified with a gradient silica gel column chromatography from EtOAc/Hexane 7:3 to EtOAc/Hexane 1:0 affording a white powder (42 mg, 39%). <sup>1</sup>H NMR (500 MHz, DMSO-<i>d</i><sub>6</sub>) δ ppm 8.43 (dd, <i>J</i>=8.6, 4.9 Hz, 2 H), 7.98 (d, <i>J</i>=8.1 Hz, 1 H), 7.89 (d, <i>J</i>=8.8 Hz, 1 H), 7.92 (d, <i>J</i>=8.8 Hz, 1 H), 7.78 (t, <i>J</i>=8.9 Hz, 2 H), 7.58 - 7.73 (m, 2 H), 7.44 - 7.55 (m, 0.5 H), 7.30 - 7.44 (m, 1 H), 7.03 - 7.26 (m, 2.5 H), 6.63 (dd, <i>J</i>=7.7, 3.30 Hz, 1 H), 5.13 - 5.22 (m, 0.5 H), 5.05 - 5.12 (m, 0.5 H), 5.02 (t, <i>J</i>=4.9 Hz, 0.5 H), 4.93 - 5.00 (m, 0.5 H), 4.89 (t, <i>J</i>=4.9 Hz, 0.5 H), 4.77 - 4.86 (m, 0.5 H), 3.79 - 4.01 (m, 1 H), 3.41 - 3.58 (m, 1 H), 3.27 - 3.38 (m, 1 H), 3.16 (s, 1.5 H), 3.00 (s, 1.5 H). <sup>13</sup>C NMR (100 MHz, DMSO-<i>d</i><sub>6</sub>) δ ppm 166.66, 166.62, 150.81, 50.73, 143.62, 143.28, 140.75, 140.61, 139.89, 139.67, 137.67, 137.44, 130.16, 130.05, 130.01, 129.63, 129.42, 129.14, 128.80, 128.74, 128.48, 128.41, 127.63, 126.92, 126.36, 126.33, 126.29, 125.33, 125.29, 122.13, 121.51, 59.23, 59.03, 54.91, 54.74, 50.29, 47.86, 36.01, 35.22. HRMS (<i>m/z</i>): [M + H]<sup>+</sup>, calcd for C<sub>26</sub>H<sub>25</sub>F<sub>3</sub>N<sub>3</sub>O<sub>6</sub>S, 564.1411; found, 564.1382.</p> |

|                                                                                     |                                                                                                                                                                                                                                                                                                                                                                                                                                                                                                                                                                                                                                                                                                                                                                                                                                                                                                                                                                                                                                                                                                                                                                                                                                                                                                                                                                                                                                                                                                                      |
|-------------------------------------------------------------------------------------|----------------------------------------------------------------------------------------------------------------------------------------------------------------------------------------------------------------------------------------------------------------------------------------------------------------------------------------------------------------------------------------------------------------------------------------------------------------------------------------------------------------------------------------------------------------------------------------------------------------------------------------------------------------------------------------------------------------------------------------------------------------------------------------------------------------------------------------------------------------------------------------------------------------------------------------------------------------------------------------------------------------------------------------------------------------------------------------------------------------------------------------------------------------------------------------------------------------------------------------------------------------------------------------------------------------------------------------------------------------------------------------------------------------------------------------------------------------------------------------------------------------------|
| 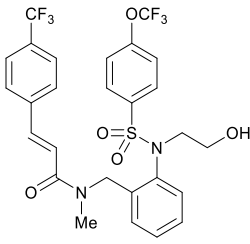   | <p><b>(E)-N-(2-((N-(2-Hydroxyethyl)-4-(trifluoromethoxy)phenyl)sulfonamido)benzyl)-N-methyl-3-(4-(trifluoromethyl)phenyl)acrylamide (30)</b></p> <p>This compound was prepared by the same procedure for <b>12</b> and was purified with a gradient silica gel column chromatography from EtOAc/Hexane 7:3 to EtOAc/Hexane 1:0 affording a white powder (90 mg, 83%). <sup>1</sup>H NMR (500 MHz, DMSO-<i>d</i><sub>6</sub>) δ ppm 7.98 (d, <i>J</i>=8.1 Hz, 1 H). 7.72 - 7.86 (m, 4 H), 7.56 - 7.72 (m, 4 H), 7.44 - 7.52 (m, 0.5 H), 7.28 - 7.42 (m, 1 H), 7.15 - 7.25 (m, 1.5 H), 7.01 - 7.15 (m, 1 H), 6.62 (d, <i>J</i>=7.8 Hz, 1 H), 5.02 - 5.20 (m, 1 H), 4.91 - 5.01 (m, 1 H), 4.77 - 4.91 (m, 1 H), 3.79 - 3.97 (m, 1 H), 3.39 - 3.58 (m, 1 H), 3.24 - 3.39 (m, 1 H), 3.15 (s, 1.5 H), 2.99 (s, 1.5 H). <sup>13</sup>C NMR (100 MHz, DMSO-<i>d</i><sub>6</sub>) δ ppm 166.66, 166.61, 152.20, 152.10, 140.73, 140.59, 139.93, 139.89, 139.72, 138.05, 137.81, 137.12, 136.80, 131.20, 131.04, 130.19, 130.03, 129.87, 129.42, 129.13, 128.64, 128.60, 128.31, 128.25, 127.54, 126.82, 126.34, 126.32, 126.28, 122.13, 122.03, 121.85, 121.52, 119.28, 59.34, 59.15, 54.75, 54.58, 50.31, 47.89, 36.00, 35.2. HRMS (m/z): [M + H]<sup>+</sup>, calcd for C<sub>27</sub>H<sub>25</sub>F<sub>6</sub>N<sub>2</sub>O<sub>5</sub>S, 603.1383; found, 603.1383.</p>                                                                                                                                                |
|    | <p><b>(E)-N-(2-((N-(2-Hydroxyethyl)-2,3-dihydrobenzo[b][1,4]dioxine)-6-sulfonamido)benzyl)-N-methyl-3-(4-(trifluoromethyl)phenyl)acrylamide (31)</b></p> <p>This compound was prepared by the same procedure for <b>12</b> and was purified with a gradient silica gel column chromatography from EtOAc/Hexane 3:7 to EtOAc/Hexane 7:3 affording a white powder (80 mg, 74%). <sup>1</sup>H NMR (500 MHz, CDCl<sub>3</sub>) δ ppm 7.98 (d, <i>J</i>=8.1 Hz, 1 H), 7.77 (t, <i>J</i>=7.5 Hz, 2 H), 7.56 - 7.71 (m, 2 H), 7.42 - 7.54 (m, 0.5 H), 7.27 - 7.41 (m, 1 H), 7.20 (q, <i>J</i>=7.9 Hz, 1 H), 6.95 - 7.17 (m, 4.5 H), 6.64 (t, <i>J</i>=7.7 Hz, 1 H), 5.09 - 5.18 (m, 0.5 H), 5.01 - 5.09 (m, 0.5 H), 4.86 - 4.97 (m, 1 H), 4.74 - 4.86 (m, 1 H), 4.23 - 4.44 (m, 4 H), 3.77 - 3.92 (m, 1 H), 3.38 - 3.54 (m, 1 H), 3.16 - 3.26 (m, 1 H), 3.14 (s, 1.5 H), 2.99 (s, 1.5 H). <sup>13</sup>C NMR (100 MHz, DMSO-<i>d</i><sub>6</sub>) δ ppm 166.40, 166.35, 148.13, 148.00, 143.82, 143.78, 140.43, 140.34, 139.75, 139.67, 139.47, 138.33, 138.09, 130.17, 129.93, 129.82, 129.61, 129.39, 129.20, 128.96, 128.91, 128.26, 128.24, 127.96, 127.88, 127.11, 126.42, 126.11, 126.06, 126.03, 123.16, 121.98, 121.91, 121.82, 121.36, 119.15, 119.10, 117.22, 117.10, 64.95, 64.54, 60.23, 59.25, 59.06, 54.43, 54.20, 50.15, 47.65, 35.77, 35.07, 21.23, 14.55. HRMS (m/z): [M + H]<sup>+</sup>, calcd for C<sub>28</sub>H<sub>28</sub>F<sub>3</sub>N<sub>2</sub>O<sub>6</sub>S, 577.1615; found, 577.1615.</p> |
|  | <p><b>(E)-N-(2-((4-Cyano-N-(2-hydroxyethyl)phenyl)sulfonamido)benzyl)-N-methyl-3-(4-(trifluoromethyl)phenyl)acrylamide (32)</b></p> <p>This compound was prepared by the same procedure for <b>12</b> and was purified with a gradient silica gel column chromatography from EtOAc/Hexane 3:7 to EtOAc/Hexane 7:3 affording white flakes (98 mg, 91%). <sup>1</sup>H NMR (500 MHz, DMSO-<i>d</i><sub>6</sub>) δ ppm 8.11 (dd, <i>J</i>=8.3, 5.6 Hz, 2 H), 7.98 (d, <i>J</i>=8.1 Hz, 1 H), 7.71 - 7.88 (m, 4 H), 7.56 - 7.71 (m, 2 H), 7.43 - 7.54 (m, 0.5 H), 7.25 - 7.43 (m, 1 H), 7.03 - 7.25 (m, 2.5 H), 6.61 (dd, <i>J</i>=7.5, 5.01 Hz, 1 H), 5.04 - 5.22 (m, 1 H), 4.92 - 5.04 (m, 1 H), 4.78 - 4.86 (m, 1 H), 3.84 - 3.99 (m, 1 H), 3.40 - 3.55 (m, 1 H), 3.25 - 3.38 (m, 1 H), 3.15 (s, 1.5 H), 3.00 (s, 1.5 H). <sup>13</sup>C NMR (100 MHz, DMSO-<i>d</i><sub>6</sub>) δ ppm 166.68, 166.63, 142.25, 141.91, 140.75, 140.61, 139.89, 139.67, 137.73, 137.50, 134.18, 134.13, 130.19, 130.17, 130.00, 129.88, 129.85, 129.57, 129.41, 129.27, 129.13, 128.73, 128.71, 128.45, 128.35, 127.60, 126.88, 126.35, 126.32, 126.28, 126.18, 126.09, 123.48, 123.38, 122.11, 121.50, 118.39, 118.36, 116.48, 116.36, 59.26, 59.06, 54.88, 54.70, 50.29, 47.88, 36.01, 35.22. HRMS (m/z): [M + H]<sup>+</sup>, calcd for C<sub>27</sub>H<sub>25</sub>F<sub>3</sub>N<sub>3</sub>O<sub>4</sub>S, 544.1512; found, 544.1506.</p>                                                                                       |

|  |                                                                                                                                                                                                                                                                                                                                                                                                                                                                                                                                                                                                                                                                                                                                                                                                                                                                                                                                                                                                                                                                                                                                                                                                                                                                                                                                                                                                                        |
|--|------------------------------------------------------------------------------------------------------------------------------------------------------------------------------------------------------------------------------------------------------------------------------------------------------------------------------------------------------------------------------------------------------------------------------------------------------------------------------------------------------------------------------------------------------------------------------------------------------------------------------------------------------------------------------------------------------------------------------------------------------------------------------------------------------------------------------------------------------------------------------------------------------------------------------------------------------------------------------------------------------------------------------------------------------------------------------------------------------------------------------------------------------------------------------------------------------------------------------------------------------------------------------------------------------------------------------------------------------------------------------------------------------------------------|
|  | <p><b>(E)-3-(4-Chlorophenyl)-N-(2-(N-(2-hydroxyethyl)thiophene-2-sulfonamido)benzyl)-N-methylacrylamide (33)</b></p> <p>This compound was prepared by the same procedure for <b>12</b> and was purified with a gradient silica gel column chromatography from EtOAc/Hexane 7:3 to EtOAc/Hexane 1:0 affording an off-white powder (151 mg, 52%). <sup>1</sup>H NMR (400 MHz, DMSO-<i>d</i><sub>6</sub>) δ ppm 8.07 (br. s., 0.5 H), 7.80 (d, <i>J</i>=7.5 Hz, 1 H), 7.52 - 7.73 (m, 3 H), 7.49 (d, <i>J</i>=7.5 Hz, 1 H), 7.18 - 7.43 (m, 5 H), 6.91 - 7.16 (m, 1.5 H), 6.67 (d, <i>J</i>=7.5 Hz, 1 H), 4.70 - 5.22 (m, 3 H), 3.94 (br. s., 1 H), 3.44 - 3.68 (m, 1 H), 3.35 (br. s., 1 H), 3.15 (s., 1.5 H), 3.00 (s., 1.5 H). <sup>13</sup>C NMR (100 MHz, DMSO-<i>d</i><sub>6</sub>) δ ppm 166.86, 166.82, 141.10, 141.03, 140.03, 139.85, 138.26, 138.04, 134.96, 134.81, 134.79, 134.75, 134.70, 134.63, 134.24, 134.01, 130.55, 130.27, 129.84, 129.52, 129.40, 128.91, 128.80, 128.62, 128.22, 128.10, 127.80, 127.48, 126.75, 119.98, 119.45, 59.57, 59.35, 54.93, 54.74, 50.31, 47.89, 36.03, 35.29. HRMS (<i>m/z</i>): [M + H]<sup>+</sup>, calcd for C<sub>23</sub>H<sub>24</sub>ClN<sub>2</sub>O<sub>4</sub>S<sub>2</sub>, 491.0861; found, 491.0834.</p>                                                                                                                                                   |
|  | <p><b>(E)-3-(4-Chlorophenyl)-N-(2-(N-(2-hydroxyethyl)thiophene-3-sulfonamido)benzyl)-N-methylacrylamide (34)</b></p> <p>This compound was prepared by the same procedure for <b>12</b> for and was purified with a gradient silica gel column chromatography from EtOAc/Hexane 7:3 to EtOAc/Hexane 1:0 affording an off-white powder (97 mg, 44%). <sup>1</sup>H NMR (400 MHz, DMSO-<i>d</i><sub>6</sub>) δ ppm 8.04 - 8.26 (m, 0.5 H), 7.73 - 7.92 (m, 2 H), 7.51 - 7.66 (m, 2 H), 7.48 (d, <i>J</i>=8.3 Hz, 1 H), 7.14 - 7.43 (m, 5 H), 6.87 - 7.14 (m, 1.5 H), 6.62 (d, <i>J</i>=7.9 Hz, 1 H), 4.99 - 5.22 (m, 1 H), 4.88 - 4.98 (m, 1 H), 4.77 - 4.88 (m, 1 H), 3.79 - 4.06 (m, 1 H), 3.42 - 3.58 (m, 1 H), 3.20 - 3.32 (m, 1 H), 3.14 (s, 1.5 H), 2.99 (s, 1.5 H). <sup>13</sup>C NMR (100 MHz, DMSO-<i>d</i><sub>6</sub>) δ ppm 166.84, 166.82, 141.11, 141.01, 140.02, 139.82, 138.53, 138.32, 137.86, 137.53, 134.81, 134.79, 134.74, 134.62, 133.55, 133.24, 130.55, 130.27, 130.05, 129.93, 129.68, 129.53, 129.25, 128.58, 128.31, 128.17, 128.05, 127.41, 126.67, 126.60, 119.99, 119.44, 59.60, 59.39, 54.81, 54.63, 50.31, 47.87, 36.02, 35.25. HRMS (<i>m/z</i>): [M + H]<sup>+</sup>, calcd for C<sub>23</sub>H<sub>24</sub>ClN<sub>2</sub>O<sub>4</sub>S<sub>2</sub>, 491.0861; found, 491.0838.</p>                                                                                                  |
|  | <p><b>(E)-N-(2-((N-(2-Hydroxyethyl)-4-methylphenyl)sulfonamido)benzyl)-3-(4-methoxyphenyl)-N-methylacrylamide (35)</b></p> <p>This compound was prepared by the same procedure for <b>6</b> and was purified with a gradient silica gel column chromatography from EtOAc/Hexane 7:3 to EtOAc/Hexane 1:0 affording a white powder (143 mg, 66%). <sup>1</sup>H NMR (500 MHz, DMSO-<i>d</i><sub>6</sub>) δ ppm 7.69 (d, <i>J</i>=8.6 Hz, 1 H), 7.47 - 7.60 (m, 4 H), 7.38 - 7.47 (m, 2 H), 7.25 - 7.38 (m, 1 H), 7.11 - 7.22 (m, 1.5 H), 7.09 (d, <i>J</i>=7.6 Hz, 0.5 H), 7.03 (d, <i>J</i>=7.8 Hz, 0.5 H), 6.97 (d, <i>J</i>=8.6 Hz, 1 H), 6.81 - 6.92 (m, 1.5 H), 6.55 (d, <i>J</i>=7.6 Hz, 1 H), 5.08 (s, 1 H), 4.86 - 4.97 (m, 1 H), 4.74 - 4.86 (m, 1 H), 3.81 - 3.96 (m, 1 H), 3.79 (s, 1.5 H), 3.72 (s, 1.5 H), 3.38 - 3.53 (m, 1 H), 3.16 - 3.26 (m, 1 H), 3.11 (s, 1.5 H), 2.97 (s, 1.5 H), 2.41 (s, 3 H). <sup>13</sup>C NMR (100 MHz, DMSO-<i>d</i><sub>6</sub>) δ ppm 190.97, 167.01, 160.90, 144.31, 144.13, 142.07, 139.98, 138.00, 135.13, 134.85, 130.28, 130.26, 130.22, 129.98, 129.38, 128.94, 128.30, 128.17, 128.02, 127.85, 127.80, 127.19, 126.35, 116.11, 115.63, 114.7, 59.26, 59.03, 55.75, 55.71, 54.45, 54.23, 50.11, 47.63, 35.76, 35.02, 21.55. HRMS (<i>m/z</i>): [M + H]<sup>+</sup>, calcd for C<sub>27</sub>H<sub>31</sub>N<sub>2</sub>O<sub>5</sub>S, 495.1948; found, 495.1963.</p> |

|                                                                                     |                                                                                                                                                                                                                                                                                                                                                                                                                                                                                                                                                                                                                                                                                                                                                                                                                                                                                                                                                                                                                                                                                                                                                                                                                                                                                                                                                                                                 |
|-------------------------------------------------------------------------------------|-------------------------------------------------------------------------------------------------------------------------------------------------------------------------------------------------------------------------------------------------------------------------------------------------------------------------------------------------------------------------------------------------------------------------------------------------------------------------------------------------------------------------------------------------------------------------------------------------------------------------------------------------------------------------------------------------------------------------------------------------------------------------------------------------------------------------------------------------------------------------------------------------------------------------------------------------------------------------------------------------------------------------------------------------------------------------------------------------------------------------------------------------------------------------------------------------------------------------------------------------------------------------------------------------------------------------------------------------------------------------------------------------|
| 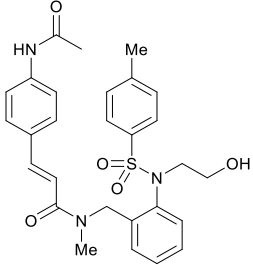   | <p><b>(E)-3-(4-Acetamidophenyl)-N-(2-((N-(2-hydroxyethyl)-4-methylphenyl)sulfonamido)benzyl)-N-methylacrylamide (36)</b></p> <p>This compound was prepared by the same procedure for <b>6</b> and was purified through trituration with DCM affording an off-white powder (78 mg, 71%). <sup>1</sup>H NMR (500 MHz, DMSO-<i>d</i><sub>6</sub>) δ ppm 10.09 (s, 0.5 H), 10.03 (s, 0.5 H), 7.59 - 7.72 (m, 2 H), 7.45 - 7.59 (m, 5 H), 7.39 - 7.45 (m, 2 H), 7.24 - 7.38 (m, 1 H), 7.12 - 7.24 (m, 1.5 H), 6.99 - 7.12 (m, 1 H), 6.77 - 6.96 (m, 0.5 H), 6.47 - 6.62 (m, 1 H), 5.07 (d, <i>J</i>=4.7 Hz, 1 H), 4.86 - 4.97 (m, 1 H), 4.74 - 4.86 (m, 1 H), 3.75 - 3.94 (m, 1 H), 3.37 - 3.55 (m, 1 H), 3.26 - 3.36 (m, 1 H), 3.17 - 3.27 (m, 1 H), 3.11 (s, 1.5 H), 2.98 (s, 1.5 H), 2.41 (s, 3 H), 2.05 (s, 1.5 H), 2.01 (s, 1.5 H). <sup>13</sup>C NMR (100 MHz, DMSO-<i>d</i><sub>6</sub>) δ ppm 169.00, 168.94, 166.92, 144.32, 144.13, 141.95, 141.12, 141.06, 139.97, 139.76, 138.21, 137.99, 135.13, 134.84, 30.28, 130.22, 130.05, 129.40, 129.32, 129.07, 128.95, 128.29, 128.17, 127.81, 127.18, 126.35, 119.30, 119.25, 116.85, 116.39, 65.47, 59.27, 59.03, 54.49, 54.24, 49.07, 47.64, 35.75, 35.06, 24.58, 24.55, 21.55. HRMS (m/z): [M + H]<sup>+</sup>, calcd for C<sub>28</sub>H<sub>32</sub>N<sub>3</sub>O<sub>5</sub>S, 522.2057; found, 522.2081.</p>                         |
|    | <p><b>N-(2-((Cinnamyl(methyl)amino)methyl)phenyl)-N-(2-hydroxyethyl)-4-methoxybenzenesulfonamide (37)</b></p> <p>This compound was prepared by the same procedure for <b>12</b> and was purified with a gradient silica gel column chromatography from EtOAc/Hexane 7:3 to EtOAc/Hexane 1:0 affording a white powder (69 mg, 64%). <sup>1</sup>H NMR (500 MHz, CDCl<sub>3</sub>) δ ppm 7.63 (br. s., 1 H), 7.51 - 7.59 (m, 2 H), 7.40 - 7.51 (m, 2 H), 7.15 - 7.35 (m, 6 H), 6.88 - 7.04 (m, 2 H), 6.51 - 6.63 (m, 1 H), 6.47 (dd, <i>J</i>=8.0, 1.1 Hz, 1 H), 6.30 - 6.44 (m, 1 H), 4.97 (d, <i>J</i>=12.2 Hz, 1 H), 4.08 (ddd, <i>J</i>=13.0, 8.6, 2.9 Hz, 1 H), 3.89 (s, 3 H), 3.69 (d, <i>J</i>=12.2 Hz, 1 H), 3.43 (br. s., 1 H), 3.19 - 3.37 (m, 2 H), 3.04 - 3.19 (m, 1 H), 2.88 - 3.01 (m, 1 H), 2.25 (s, 3 H). <sup>13</sup>C NMR (125 MHz, CDCl<sub>3</sub>) δ ppm 163.37, 140.19, 139.68, 136.97, 134.43, 133.72, 130.79, 128.89, 128.80, 128.71, 128.22, 127.80, 127.59, 126.87, 125.39, 114.14, 60.69, 59.49, 59.29, 55.95, 55.85, 41.68. HRMS (m/z): [M + H]<sup>+</sup>, calcd for C<sub>26</sub>H<sub>31</sub>N<sub>2</sub>O<sub>4</sub>S, 467.1999; found, 467.2009.</p>                                                                                                                                                                                                       |
|  | <p><b>(E)-N-(2-(((3-(4-Chlorophenyl)allyl)(methyl)amino)methyl)phenyl)-N-(2-hydroxyethyl)-4-methylbenzenesulfonamide (38)</b></p> <p>This compound was prepared by the same procedure for <b>12</b> and was purified with a gradient silica gel column chromatography from EtOAc/Hexane 7:3 to EtOAc/Hexane 1:0 affording an off-white powder (134 mg, 48%). <sup>1</sup>H NMR (500 MHz, CDCl<sub>3</sub>) δ ppm 7.65 (br. s., 1 H), 7.49 (d, <i>J</i>=8.1 Hz, 2 H), 7.40 (d, <i>J</i>=8.1 Hz, 2 H), 7.20 - 7.35 (m, 6 H), 7.17 (t, <i>J</i>=7.2 Hz, 1 H), 6.48 - 6.62 (m, 1 H), 6.31 - 6.48 (m, 2 H), 4.99 (d, <i>J</i>=12.2 Hz, 1 H), 3.96 - 4.19 (m, 1 H), 3.67 (d, <i>J</i>=12.5 Hz, 1 H), 3.43 (dd, <i>J</i>=13.1, 5.76 Hz, 1 H), 3.15 - 3.34 (m, 1 H), 3.00 - 3.15 (m, 1 H), 2.88 (d, <i>J</i>=12.2 Hz, 1 H), 2.44 (s, 3 H), 2.22 (s, 3 H). <sup>13</sup>C NMR (125 MHz, CDCl<sub>3</sub>) δ ppm 164.85, 144.04, 140.06, 139.65, 135.48, 134.04, 133.75, 133.35, 133.03, 129.62, 128.90, 128.83, 128.73, 128.24, 128.15, 127.53, 60.83, 59.43, 59.26, 55.99, 41.88, 21.81. HRMS (m/z): [M + H]<sup>+</sup>, calcd for C<sub>26</sub>H<sub>30</sub>ClN<sub>2</sub>O<sub>3</sub>S, 485.1660; found, 485.1634.</p>                                                                                                                                                                           |
|  | <p><b>(E)-N-(2-(((3-(4-Chlorophenyl)allyl)(methyl)amino)methyl)phenyl)-N-(2-hydroxyethyl)-4-(trifluoromethyl)benzenesulfonamide (39)</b></p> <p>This compound was prepared by the same procedure for <b>12</b> and was purified with a gradient silica gel column chromatography from EtOAc/Hexane 1:1 to EtOAc/Hexane 1:0 affording a white powder (85 mg, 31%). <sup>1</sup>H NMR (500 MHz, CDCl<sub>3</sub>) δ ppm 7.67 - 7.84 (m, 4 H), 7.62 (br. s., 1 H), 7.37 - 7.44 (m, 2 H), 7.33 - 7.37 (m, 1 H), 7.25 - 7.33 (m, 3 H), 7.20 (td, <i>J</i>=7.7, 1.7 Hz, 1 H), 6.51 - 6.61 (m, 1 H), 6.41 - 6.47 (m, 1 H), 6.34 - 6.41 (m, 1 H), 4.98 (d, <i>J</i>=12.2 Hz, 1 H), 4.12 (ddd, <i>J</i>=12.7, 8.8, 2.9 Hz, 1 H), 3.61 - 3.79 (m, 1 H), 3.44 (dd, <i>J</i>=13.4, 6.0 Hz, 1 H), 3.28 (ddd, <i>J</i>=12.8, 8.7, 1.5 Hz, 1 H), 3.21 (dd, <i>J</i>=13.5, 7.6 Hz, 1 H), 3.11 (ddd, <i>J</i>=12.5, 3.9, 1.0 Hz, 1 H), 2.91 (d, <i>J</i>=12.2 Hz, 1 H), 2.23 (s, 3 H). <sup>13</sup>C NMR (100 MHz, DMSO-<i>d</i><sub>6</sub>) δ ppm 141.55, 140.25, 138.25, 136.03, 133.42, 133.10, 132.31, 132.06, 131.72, 129.30, 129.02, 128.96, 128.74, 128.47, 128.19, 126.97, 26.93, 126.89, 126.86, 125.30, 122.59, 59.97, 58.38, 57.55, 54.92, 42.18. HRMS (m/z): [M + H]<sup>+</sup>, calcd for C<sub>26</sub>H<sub>27</sub>ClF<sub>3</sub>N<sub>2</sub>O<sub>3</sub>S, 539.1378; found, 539.1401.</p> |



|                                                                                     |                                                                                                                                                                                                                                                                                                                                                                                                                                                                                                                                                                                                                                                                                                                                                                                                                                                                                                                                                                                                                                                                                                                                                                                                                                                                                                                                                                                          |
|-------------------------------------------------------------------------------------|------------------------------------------------------------------------------------------------------------------------------------------------------------------------------------------------------------------------------------------------------------------------------------------------------------------------------------------------------------------------------------------------------------------------------------------------------------------------------------------------------------------------------------------------------------------------------------------------------------------------------------------------------------------------------------------------------------------------------------------------------------------------------------------------------------------------------------------------------------------------------------------------------------------------------------------------------------------------------------------------------------------------------------------------------------------------------------------------------------------------------------------------------------------------------------------------------------------------------------------------------------------------------------------------------------------------------------------------------------------------------------------|
| 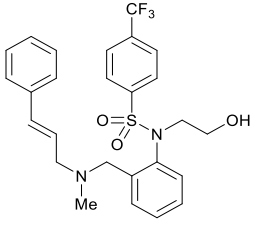   | <p><b><i>N</i>-(2-((Cinnamyl(methyl)amino)methyl)phenyl)-<i>N</i>-(2-hydroxyethyl)-4-(trifluoromethyl)benzenesulfonamide (40)</b></p> <p>This compound was prepared by the same procedure for <b>12</b> and was purified with a gradient silica gel column chromatography from EtOAc/Hexane 7:3 to EtOAc/Hexane 1:0 affording a white powder (127 mg, 47%). <sup>1</sup>H NMR (500 MHz, CDCl<sub>3</sub>) δ ppm 7.76 (s, 4 H), 7.66 (br. s., 1 H), 7.44 - 7.51 (m, 2 H), 7.34 - 7.39 (m, 1 H), 7.27 - 7.34 (m, 3 H), 7.18 - 7.27 (m, 2 H), 6.60 (d, <i>J</i>=15.7 Hz, 1 H), 6.29 - 6.49 (m, 2 H), 4.96 (d, <i>J</i>=12.5 Hz, 1 H), 4.12 (ddd, <i>J</i>=12.4, 9.0, 2.8 Hz, 1 H), 3.69 (dt, <i>J</i>=12.8, 3.5 Hz, 1 H), 3.43 (dd, <i>J</i>=13.2, 5.9 Hz, 1 H), 3.18 - 3.36 (m, 2 H), 3.12 (dd, <i>J</i>=12.8, 2.8 Hz, 1 H), 2.96 (d, <i>J</i>=12.5 Hz, 1 H), 2.24 (s, 3 H). <sup>13</sup>C NMR (100 MHz, DMSO-<i>d</i><sub>6</sub>) δ ppm 141.56, 140.25, 138.26, 137.07, 133.42, 133.10, 133.05, 132.09, 129.31, 129.04, 128.95, 128.75, 128.21, 127.97, 127.08, 126.93, 126.89, 126.76, 125.30, 122.59, 60.08, 58.39, 57.59, 56.94, 42.13. HRMS (<i>m/z</i>): [M + H]<sup>+</sup>, calcd for C<sub>26</sub>H<sub>28</sub>ClF<sub>3</sub>N<sub>2</sub>O<sub>3</sub>S, 505.1767; found, 505.1790.</p>                                                                                     |
|    | <p><b><i>N</i>-(2-((Cinnamyl(methyl)amino)methyl)phenyl)-<i>N</i>-(2-hydroxyethyl)-4-methylbenzenesulfonamide (41)</b></p> <p>This compound was prepared by the same procedure for <b>12</b> and was purified with a gradient silica gel column chromatography from EtOAc/Hexane 7:3 to EtOAc/Hexane 1:0 affording a white powder (80 mg, 29%). <sup>1</sup>H NMR (500 MHz, CDCl<sub>3</sub>) δ ppm 7.62 (br. s., 1 H), 7.39 - 7.57 (m, 4 H), 7.15 - 7.38 (m, 8 H), 6.59 (d, <i>J</i>=15.7 Hz, 1 H), 6.30 - 6.51 (m, 2 H), 4.97 (d, <i>J</i>=12.2 Hz, 1 H), 3.97 - 4.18 (m, 1 H), 3.57 - 3.80 (m, 1 H), 3.42 (dd, <i>J</i>=13.3, 6.2 Hz, 1 H), 3.20 - 3.35 (m, 2 H), 3.09 (dd, <i>J</i>=13.0, 2.7 Hz, 1 H), 2.94 (d, <i>J</i>=12.2 Hz, 1 H), 2.44 (s, 3 H), 2.24 (s, 3 H). <sup>13</sup>C NMR (125 MHz, CDCl<sub>3</sub>) δ ppm 144.00, 140.13, 139.69, 136.97, 134.38, 134.15, 133.73, 129.62, 128.88, 128.75, 28.70, 128.22, 127.78, 127.58, 126.87, 125.44, 60.69, 59.52, 59.32, 56.03, 41.69, 21.81. HRMS (<i>m/z</i>): [M + H]<sup>+</sup>, calcd for C<sub>26</sub>H<sub>32</sub>N<sub>2</sub>O<sub>3</sub>S, 451.2050; found, 451.2068.</p>                                                                                                                                                                                                                                       |
|  | <p><b>(<i>E</i>)-<i>N</i>-(4-(<i>N</i>-(2-((3-(4-Chlorophenyl)allyl)(methyl)amino)methyl)phenyl)-<i>N</i>-(2-hydroxyethyl)sulfamoyl)phenyl)acetamide (42)</b></p> <p>This compound was prepared by the same procedure for <b>12</b> and was purified with a gradient silica gel column chromatography from EtOAc/Methanol 1:0 to EtOAc/Methanol 95:5 affording a white powder (130 mg, 80%). <sup>1</sup>H NMR (500 MHz, CDCl<sub>3</sub>) δ ppm 7.98 (s, 1 H), 7.78 (br. s., 1 H), 7.65 (m, <i>J</i>=8.6 Hz, 2 H), 7.52 (m, <i>J</i>=8.8 Hz, 2 H), 7.38 (d, <i>J</i>=8.3 Hz, 2 H), 7.30 - 7.34 (m, 1 H), 7.21 - 7.30 (m, 3 H), 7.17 (t, <i>J</i>=7.6 Hz, 1 H), 6.47 - 6.59 (m, 1 H), 6.43 (d, <i>J</i>=7.8 Hz, 1 H), 6.35 - 6.42 (m, 1 H), 4.98 (d, <i>J</i>=12.2 Hz, 1 H), 4.08 (ddd, <i>J</i>=12.6, 9.3, 2.8 Hz, 1 H), 3.58 - 3.73 (m, 1 H), 3.42 (dd, <i>J</i>=13.5, 5.9 Hz, 1 H), 3.14 - 3.33 (m, 2 H), 3.08 (dd, <i>J</i>=12.8, 2.6 Hz, 1 H), 2.79 - 2.94 (m, 1 H), 2.21 (s, 3 H), 2.18 (s, 3 H). <sup>13</sup>C NMR (125 MHz, CDCl<sub>3</sub>) δ ppm 169.05, 142.69, 139.82, 139.49, 135.37, 133.83, 133.45, 133.22, 131.49, 129.90, 129.10, 128.86, 128.41, 128.11, 127.46, 126.14, 119.13, 60.81, 59.21, 55.91, 41.86, 32.41, 24.89. HRMS (<i>m/z</i>): [M + H]<sup>+</sup>, calcd for C<sub>27</sub>H<sub>31</sub>N<sub>3</sub>O<sub>4</sub>S, 528.1718; found, 528.1721.</p> |
|  | <p><b>(<i>E</i>)-<i>N</i>-(2-((3-(4-Chlorophenyl)allyl)(methyl)amino)methyl)phenyl)-<i>N</i>-(2-hydroxyethyl)-1-phenylmethanesulfonamide (43)</b></p> <p>This compound was prepared by the same procedure for <b>12</b> and was purified with a gradient silica gel column chromatography from EtOAc/Hexane 7:3 to EtOAc/Hexane 1:0 affording an off-white powder (70 mg, 42%). <sup>1</sup>H NMR (500 MHz, CDCl<sub>3</sub>) δ ppm 7.49 (br. s., 1 H), 7.28 - 7.46 (m, 10 H), 7.20 - 7.28 (m, 2 H), 7.17 (d, <i>J</i>=7.6 Hz, 1 H), 6.50 (d, <i>J</i>=15.9 Hz, 1 H), 6.25 - 6.40 (m, 1 H), 4.78 (d, <i>J</i>=12.2 Hz, 1 H), 4.30-4.38 (m, 1 H), 3.93 - 4.11 (m, 1 H), 3.58 - 3.77 (m, 1 H), 3.43 (dd, <i>J</i>=13.2, 3.2 Hz, 1 H), 3.22 - 3.39 (m, 2 H), 3.15 (dd, <i>J</i>=13.2, 7.3 Hz, 1 H), 2.86 (d, <i>J</i>=12.2 Hz, 1 H), 2.18 (s, 3 H). <sup>13</sup>C NMR (125 MHz, CDCl<sub>3</sub>) δ ppm 139.93, 139.28, 135.34, 134.13, 133.42, 133.12, 131.09, 129.57, 129.05, 128.97, 128.85, 128.45, 128.37, 128.10, 128.05, 126.21, 60.79, 59.68, 59.33, 56.37, 55.35, 41.81. HRMS (<i>m/z</i>): [M + H]<sup>+</sup>, calcd for C<sub>26</sub>H<sub>30</sub>ClN<sub>2</sub>O<sub>3</sub>S, 485.1660; found, 485.1685.</p>                                                                                                                                                              |

|                                                                                     |                                                                                                                                                                                                                                                                                                                                                                                                                                                                                                                                                                                                                                                                                                                                                                                                                                                                                                                                                                                                                                                                                                                                                                                                                                                                                                                                                            |
|-------------------------------------------------------------------------------------|------------------------------------------------------------------------------------------------------------------------------------------------------------------------------------------------------------------------------------------------------------------------------------------------------------------------------------------------------------------------------------------------------------------------------------------------------------------------------------------------------------------------------------------------------------------------------------------------------------------------------------------------------------------------------------------------------------------------------------------------------------------------------------------------------------------------------------------------------------------------------------------------------------------------------------------------------------------------------------------------------------------------------------------------------------------------------------------------------------------------------------------------------------------------------------------------------------------------------------------------------------------------------------------------------------------------------------------------------------|
| 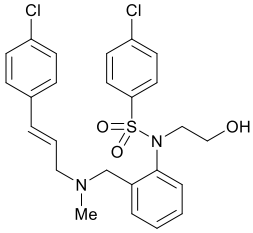   | <p><b>(E)-4-Chloro-N-(2-(((3-(4-chlorophenyl)allyl)(methylamino)methyl)phenyl)-N-(2-hydroxyethyl)benzenesulfonamide (44)</b></p> <p>This compound was prepared by the same procedure for <b>12</b> and was purified with silica gel column chromatography EtOAc/Hexane 7:3 affording a white powder (62 mg, 39%). <sup>1</sup>H NMR (500 MHz, CDCl<sub>3</sub>) δ ppm 7.58 (br. s., 1 H), 7.51 - 7.57 (m, 2 H), 7.44 - 7.50 (m, 2 H), 7.40 (d, <i>J</i>=8.3 Hz, 2 H), 7.24 - 7.35 (m, 4 H), 7.19 (td, <i>J</i>=7.6, 1.71 Hz, 1 H), 6.54 (d, <i>J</i>=16.4 Hz, 1 H), 6.33 - 6.46 (m, 2 H), 4.97 (d, <i>J</i>=12.5 Hz, 1 H), 4.09 (ddd, <i>J</i>=11.7, 9.1, 2.9 Hz, 1 H), 3.67 (dt, <i>J</i>=12.7, 3.4 Hz, 1 H), 3.43 (dd, <i>J</i>=13.3, 6.0 Hz, 1 H), 3.24 - 3.33 (m, 1 H), 3.21 (dd, <i>J</i>=13.5, 7.6 Hz, 1 H), 3.10 (ddd, <i>J</i>=12.8, 4.3, 1.7 Hz, 1 H), 2.89 (d, <i>J</i>=12.5 Hz, 1 H), 2.22 (s, 3 H). <sup>13</sup>C NMR (125 MHz, CDCl<sub>3</sub>) δ ppm 139.82, 139.70, 139.64, 135.47, 135.42, 133.97, 133.42, 133.16, 130.09, 129.34, 129.04, 128.85, 128.49, 128.13, 127.33, 126.29, 60.88, 59.29, 59.17, 56.11, 41.91. HRMS (<i>m/z</i>): [M + H]<sup>+</sup>, calcd for C<sub>25</sub>H<sub>27</sub>N<sub>2</sub>O<sub>3</sub>S, 505.1114; found, 505.1123.</p>                                                                          |
|    | <p><b>(E)-N-(2-(((3-(3,4-Dichlorophenyl)allyl)(methylamino)methyl)phenyl)-N-(2-hydroxyethyl)-4-methylbenzenesulfonamide (45)</b></p> <p>This compound was prepared by the same procedure for <b>6</b> and was purified with a gradient silica gel column chromatography from EtOAc/Hexane 3:7 to EtOAc/Hexane 1:0 affording an off-white powder (48 mg, 44%). <sup>1</sup>H NMR (500 MHz, CDCl<sub>3</sub>) δ ppm 7.42 - 7.58 (m, 3 H), 7.22 - 7.42 (m, 6 H), 7.17 (t, <i>J</i>=7.2 Hz, 1 H), 6.45 - 6.57 (m, 2 H), 6.42 (d, <i>J</i>=7.6 Hz, 1 H), 4.99 (d, <i>J</i>=12.2 Hz, 1 H), 4.09 (t, <i>J</i>=8.1 Hz, 1 H), 3.66 (d, <i>J</i>=12.5 Hz, 1 H), 3.43 (dd, <i>J</i>=13.45, 3.9 Hz, 1 H), 3.13 - 3.34 (m, 2 H), 3.07 (d, <i>J</i>=11.0 Hz, 1 H), 2.87 (d, <i>J</i>=12.2 Hz, 1 H), 2.44 (s, 3 H), 2.21 (s, 3 H). <sup>13</sup>C NMR (125 MHz, CDCl<sub>3</sub>) δ ppm 144.06, 140.02, 139.61, 137.11, 134.00, 133.73, 132.70, 131.89, 131.34, 130.61, 129.63, 128.93, 128.77, 128.73, 128.26, 128.04, 127.50, 126.03, 60.77, 59.36, 59.27, 55.93, 41.96, 21.81. HRMS (<i>m/z</i>): [M + H]<sup>+</sup>, calcd for C<sub>26</sub>H<sub>29</sub>Cl<sub>2</sub>N<sub>2</sub>O<sub>3</sub>S, 519.1270; found, 519.1286.</p>                                                                                                                                 |
|  | <p><b>2-(4-Chlorophenoxy)-N-(2-(((N-(2-hydroxyethyl)-4-methylphenyl)sulfonamido)benzyl)-N-methylacetamide (46)</b></p> <p>This compound was prepared by the same procedure for <b>6</b> and was purified with a gradient silica gel column chromatography from EtOAc/Hexane 1:1 to EtOAc/Hexane 7:3 affording a white powder (56 mg, 51%). <sup>1</sup>H NMR (500 MHz, DMSO-<i>d</i><sub>6</sub>) δ ppm 7.49 (d, <i>J</i>=8.3 Hz, 2 H), 7.41 (d, <i>J</i>=8.3 Hz, 2 H), 7.25 - 7.36 (m, 2.5 H), 7.11 - 7.25 (m, 2 H), 7.08 (d, <i>J</i>=7.6 Hz, 0.5 H), 7.00 (d, <i>J</i>=8.8 Hz, 1.5 H), 6.84 (d, <i>J</i>=8.8 Hz, 0.5 H), 6.47 - 6.58 (m, 1 H), 5.01 (s, 1 H), 4.66 - 4.98 (m, 4 H), 3.73 - 3.92 (m, 1 H), 3.35 - 3.47 (m, 1 H), 3.24 - 3.35 (m, 1 H), 3.13 - 3.24 (m, 1 H), 2.95 (s, 2 H), 2.84 (s, 1 H), 2.40 (s, 3 H). <sup>13</sup>C NMR (100 MHz, DMSO-<i>d</i><sub>6</sub>) δ ppm 168.59, 168.24, 157.72, 157.67, 144.50, 144.35, 139.42, 139.10, 138.57, 138.52, 135.40, 135.05, 130.45, 130.42, 129.78, 129.75, 129.57, 129.11, 128.59, 128.52, 128.48, 128.37, 128.14, 128.13, 127.39, 126.79, 125.18, 117.18, 117.01, 66.62, 66.51, 59.39, 59.28, 54.57, 54.48, 49.32, 47.55, 34.48, 34.44, 21.76. HRMS (<i>m/z</i>): [M + H]<sup>+</sup>, calcd for C<sub>25</sub>H<sub>28</sub>ClN<sub>2</sub>O<sub>5</sub>S, 503.1402; found, 503.1426.</p> |
|  | <p><b>3-(4-Chlorophenyl)-N-(2-(((N-(2-hydroxyethyl)-4-methylphenyl)sulfonamido)benzyl)-N-methylpropanamide (47)</b></p> <p>This compound was prepared by the same procedure for <b>6</b> and was purified with silica gel column chromatography EtOAc/Hexane 7:3 affording an off-white powder (228 mg, 83%). <sup>1</sup>H NMR (500 MHz, DMSO-<i>d</i><sub>6</sub>) δ ppm 7.49 (m, <i>J</i>=7.1 Hz, 2 H), 7.40 (m, <i>J</i>=7.6 Hz, 2 H), 7.32 (br. s., 2.5 H), 7.21 - 7.28 (m, 1.5 H), 7.06 - 7.21 (m, 2 H), 6.89 (d, <i>J</i>=6.6 Hz, 1 H), 6.52 (t, <i>J</i>=6.5 Hz, 1 H), 4.72 - 4.96 (m, 2 H), 4.59 - 4.72 (m, 1 H), 3.73 - 3.94 (m, 1 H), 3.35 - 3.49 (m, 1 H), 3.22 - 3.31 (m, 1 H), 3.09 - 3.22 (m, 1 H), 2.70 - 2.94 (m, 6 H), 2.52 - 2.63 (m, 1 H), 2.39 (br. s., 3 H). <sup>13</sup>C NMR (100 MHz, DMSO-<i>d</i><sub>6</sub>) δ ppm 172.68, 172.45, 144.46, 144.33, 141.27, 141.13, 139.88, 139.46, 138.47, 138.40, 135.45, 135.15, 131.18, 131.15, 131.11, 130.96, 130.44, 130.42, 129.42, 129.01, 128.83, 128.79, 128.47, 128.37, 128.11, 127.96, 127.38, 126.38, 59.36, 59.26, 54.56, 54.45, 50.03, 47.37, 35.69, 34.43, 34.28, 34.08, 30.73, 30.65, 21.75. HRMS (<i>m/z</i>): [M + H]<sup>+</sup>, calcd for C<sub>26</sub>H<sub>30</sub>ClN<sub>2</sub>O<sub>4</sub>S, 501.1609; found, 501.1618.</p>                                    |

|                                                                                     |                                                                                                                                                                                                                                                                                                                                                                                                                                                                                                                                                                                                                                                                                                                                                                                                                                                                                                                                                                                                                                                                                                                                                                                                                                                                                                                                                                                                                                                                                                                                                              |
|-------------------------------------------------------------------------------------|--------------------------------------------------------------------------------------------------------------------------------------------------------------------------------------------------------------------------------------------------------------------------------------------------------------------------------------------------------------------------------------------------------------------------------------------------------------------------------------------------------------------------------------------------------------------------------------------------------------------------------------------------------------------------------------------------------------------------------------------------------------------------------------------------------------------------------------------------------------------------------------------------------------------------------------------------------------------------------------------------------------------------------------------------------------------------------------------------------------------------------------------------------------------------------------------------------------------------------------------------------------------------------------------------------------------------------------------------------------------------------------------------------------------------------------------------------------------------------------------------------------------------------------------------------------|
| 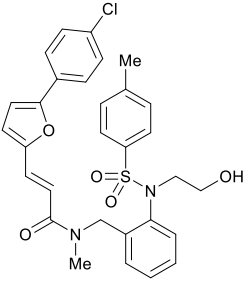   | <p><b>(E)-3-(5-(4-Chlorophenyl)furan-2-yl)-N-(2-((N-(2-hydroxyethyl)-4-methylphenyl)sulfonamido)benzyl)-N-methylacrylamide (48)</b></p> <p>This compound was prepared by the same procedure for <b>6</b> and was purified with a gradient silica gel column chromatography from EtOAc/Hexane 7:3 to EtOAc/Hexane 1:0 affording a light-yellow powder (151 mg, 71%). <sup>1</sup>H NMR (500 MHz, DMSO-<i>d</i><sub>6</sub>) δ ppm 7.87 (d, <i>J</i>=8.6 Hz, 1 H), 7.73 (d, <i>J</i>=8.6 Hz, 1 H), 7.47 - 7.63 (m, 3 H), 7.26 - 7.47 (m, 4 H), 6.99 - 7.23 (m, 5 H), 6.84 - 6.96 (m, 1 H), 6.48 - 6.67 (m, 1 H), 5.16 - 5.34 (m, 0.5 H), 5.00 - 5.16 (m, 0.5 H), 4.89 - 4.99 (m, 1 H), 4.77 - 4.89 (m, 1 H), 3.73 - 3.96 (m, 1 H), 3.40 - 3.59 (m, 1 H), 3.17 - 3.28 (m, 1 H), 3.14 (s, 1.5 H), 3.04 (s, 1.5 H), 2.28 - 2.46 (m, 3 H). <sup>13</sup>C NMR (100 MHz, DMSO-<i>d</i><sub>6</sub>) δ ppm 166.73, 154.10, 153.91, 151.95, 151.72, 144.60, 144.36, 140.27, 139.85, 138.52, 138.33, 135.43, 135.10, 133.41, 133.12, 130.50, 130.44, 129.73, 129.39, 129.24, 129.19, 129.11, 129.00, 128.64, 128.40, 128.16, 128.07, 126.46, 126.32, 117.63, 116.22, 115.77, 109.88, 59.53, 59.32, 54.58, 50.67, 47.98, 36.01, 35.58, 21.77. HRMS (<i>m/z</i>): [M + H]<sup>+</sup>, calcd for C<sub>30</sub>H<sub>30</sub>ClN<sub>2</sub>O<sub>5</sub>S, 565.1558; found, 565.1560.</p>                                                                                                                                                                               |
|   | <p><b>(E)-N-(2-((N-(2-Hydroxyethyl)-4-methylphenyl)sulfonamido)benzyl)-N-methyl-3-(pyridin-3-yl)acrylamide (49)</b></p> <p>This compound was prepared by the same procedure for <b>6</b> and was purified with a gradient silica gel column chromatography from EtOAc/Methanol 1:0 to EtOAc/Methanol 95:5 affording an off yellow powder (93 mg, 34%). <sup>1</sup>H NMR (500 MHz, DMSO-<i>d</i><sub>6</sub>) δ ppm 8.91 (d, <i>J</i>=1.5 Hz, 0.5 H), 8.75 (d, <i>J</i>=1.5 Hz, 0.5 H), 8.55 (dd, <i>J</i>=4.7, 1.2 Hz, 0.5 H), 8.48 (dd, <i>J</i>=4.7, 1.2 Hz, 0.5 H), 8.21 (d, <i>J</i>=8.1 Hz, 0.5 H), 7.97 (d, <i>J</i>=8.1 Hz, 0.5 H), 7.56 - 7.67 (m, 1 H), 7.38 - 7.56 (m, 5 H), 7.26 - 7.38 (m, 1.5 H), 7.01 - 7.25 (m, 2.5 H), 6.55 (t, <i>J</i>=6.9 Hz, 1 H), 5.00 - 5.24 (m, 1 H), 4.88 - 5.00 (m, 1 H), 4.68 - 4.88 (m, 1 H), 3.74 - 3.95 (m, 1 H), 3.38 - 3.56 (m, 1 H), 3.16 - 3.26 (m, 1 H), 3.13 (s, 1.5 H), 2.99 (s, 1.5 H), 2.40 (s, 3 H). <sup>13</sup>C NMR (100 MHz, DMSO-<i>d</i><sub>6</sub>) δ ppm 166.42, 166.38, 150.72, 150.69, 150.11, 149.90, 144.33, 144.15, 139.80, 139.55, 138.86, 138.82, 138.26, 138.00, 135.10, 135.03, 134.79, 134.67, 131.38, 131.20, 130.28, 130.22, 129.42, 128.97, 128.31, 128.26, 128.18, 127.88, 127.15, 126.46, 124.29, 120.95, 120.39, 59.23, 59.03, 54.43, 54.24, 50.14, 47.65, 40.60, 40.40, 40.19, 39.98, 39.77, 39.56, 39.35, 35.75, 35.07, 21.55. HRMS (<i>m/z</i>): [M + H]<sup>+</sup>, calcd for C<sub>25</sub>H<sub>28</sub>N<sub>3</sub>O<sub>4</sub>S, 466.1795; found, 466.1807.</p> |
|  | <p><b>(E)-3-(Furan-2-yl)-N-(2-((N-(2-hydroxyethyl)-4-methylphenyl)sulfonamido)benzyl)-N-methylacrylamide (50)</b></p> <p>This compound was prepared by the same procedure for <b>6</b> and was purified with a gradient silica gel column chromatography from EtOAc/Hexane 7:3 to EtOAc/Hexane 1:0 affording a yellow powder (69 mg, 63%). <sup>1</sup>H NMR (500 MHz, DMSO-<i>d</i><sub>6</sub>) δ ppm 7.80 (s, 0.5 H), 7.68 (s, 0.5 H), 7.47 - 7.63 (m, 2 H), 7.38 - 7.46 (m, 3 H), 7.27 - 7.38 (m, 1 H), 7.11 - 7.24 (m, 1 H), 7.08 (d, <i>J</i>=7.6 Hz, 0.5 H), 7.03 (d, <i>J</i>=7.6 Hz, 0.5 H), 6.93 - 6.99 (m, 0.5 H), 6.89 (d, <i>J</i>=3.18 Hz, 0.5 H), 6.80 (d, <i>J</i>=3.2 Hz, 0.5 H), 6.67 - 6.73 (m, 0.5 H), 6.51 - 6.64 (m, 2 H), 5.00 - 5.11 (m, 1 H), 4.88 - 4.99 (m, 1 H), 4.74 - 4.88 (m, 1 H), 3.73 - 3.96 (m, 1 H), 3.37 - 3.54 (m, 1 H), 3.13 - 3.26 (m, 1 H), 3.08 (s, 1.5 H), 2.94 (s, 1.5 H), 2.41 (s, 3 H). <sup>13</sup>C NMR (125 MHz, DMSO-<i>d</i><sub>6</sub>) δ ppm 166.74, 166.69, 151.93, 151.74, 145.68, 145.61, 144.50, 144.36, 139.86, 138.49, 138.33, 135.43, 135.20, 130.48, 130.43, 129.75, 129.62, 129.18, 128.49, 128.39, 128.14, 128.06, 127.45, 126.54, 115.94, 115.51, 114.99, 114.83, 113.25, 113.14, 59.45, 59.29, 54.63, 54.48, 50.13, 47.91, 35.93, 34.97, 21.75. HRMS (<i>m/z</i>): [M + H]<sup>+</sup>, calcd for C<sub>24</sub>H<sub>28</sub>N<sub>2</sub>O<sub>5</sub>S, 455.1635; found, 455.1658.</p>                                                                                                 |

|                                                                                     |                                                                                                                                                                                                                                                                                                                                                                                                                                                                                                                                                                                                                                                                                                                                                                                                                                                                                                                                                                                                                                                                                                                                                                                                                                                                                                                                                       |
|-------------------------------------------------------------------------------------|-------------------------------------------------------------------------------------------------------------------------------------------------------------------------------------------------------------------------------------------------------------------------------------------------------------------------------------------------------------------------------------------------------------------------------------------------------------------------------------------------------------------------------------------------------------------------------------------------------------------------------------------------------------------------------------------------------------------------------------------------------------------------------------------------------------------------------------------------------------------------------------------------------------------------------------------------------------------------------------------------------------------------------------------------------------------------------------------------------------------------------------------------------------------------------------------------------------------------------------------------------------------------------------------------------------------------------------------------------|
| 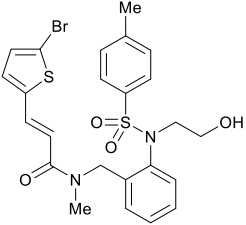   | <p><b>(E)-3-(5-Bromothiophen-2-yl)-N-(2-((N-(2-hydroxyethyl)-4-methylphenyl)sulfonamido)benzyl)-N-methylacrylamide (51)</b></p> <p>This compound was prepared by the same procedure for <b>6</b> and was purified with a gradient silica gel column chromatography from EtOAc/Hexane 7:3 to EtOAc/Hexane 1:0 affording a white powder (62 mg, 56%). <sup>1</sup>H NMR (500 MHz, DMSO-<i>d</i><sub>6</sub>) δ ppm 7.57 - 7.82 (m, 2 H), 7.47 - 7.57 (m, 2 H), 7.38 - 7.47 (m, 3 H), 7.27 - 7.38 (m, 1 H), 7.12 - 7.22 (m, 1 H), 6.90 - 7.11 (m, 1 H), 6.71 - 6.90 (m, 1 H), 6.54 (t, <i>J</i>=8.3 Hz, 1 H), 5.05 (s, 1 H), 4.85 - 4.95 (m, 1 H), 4.76 - 4.85 (m, 1 H), 3.74 - 3.94 (m, 1 H), 3.37 - 3.54 (m, 1 H), 3.14 - 3.25 (m, 1 H), 3.08 (s, 1.5 H), 2.98 (s, 1.5 H), 2.41 (s, 3 H). <sup>13</sup>C NMR (125 MHz, DMSO-<i>d</i><sub>6</sub>) δ ppm 166.38, 144.53, 144.36, 141.91, 141.81, 139.98, 139.72, 138.50, 138.21, 135.40, 135.08, 134.04, 133.92, 132.39, 132.36, 130.48, 130.43, 129.65, 129.19, 128.51, 128.47, 128.45, 128.39, 128.15, 128.09, 127.41, 126.54, 126.42, 126.38, 119.10, 118.59, 110.49, 110.36, 59.46, 59.29, 54.67, 54.47, 50.38, 47.93, 35.94, 35.34, 21.77. HRMS (<i>m/z</i>): [M + H]<sup>+</sup>, calcd for C<sub>24</sub>H<sub>27</sub>BrN<sub>2</sub>O<sub>4</sub>S<sub>2</sub>, 549.0512; found, 549.0536.</p> |
|    | <p><b>6-Bromo-N-(2-((N-(2-hydroxyethyl)-4-methylphenyl)sulfonamido)benzyl)-N-methyl-2-naphthamide (52)</b></p> <p>This compound was prepared by the same procedure for <b>6</b> and was purified with a gradient silica gel column chromatography from EtOAc/Hexane 1:1 to EtOAc/Hexane 7:3 affording a white powder (73 mg, 68%). <sup>1</sup>H NMR (500 MHz, DMSO-<i>d</i><sub>6</sub>) δ ppm 8.23 (br. s., 1.5H), 7.82 - 8.10 (m, 2.5 H), 7.59 - 7.76 (m, 2 H), 7.53 (d, <i>J</i>=7.8 Hz, 1 H), 7.28 - 7.48 (m, 5 H), 7.21 (br. s., 1 H), 6.59 (d, <i>J</i>=7.8 Hz, 0.5 H), 6.50 (d, <i>J</i>=6.6 Hz, 0.5 H), 5.00 - 5.15 (m, 0.5 H), 4.86 - 5.00 (m, 0.5 H), 4.67 (br. s., 2 H), 3.62 - 3.98 (m, 1 H), 3.03 - 3.50 (m, 3 H), 2.79 - 2.99 (m, 3 H), 2.42 (br. s., 1.5 H), 2.35 (br. s., 1.5 H). <sup>13</sup>C NMR (100 MHz, DMSO-<i>d</i><sub>6</sub>) δ ppm 171.33, 144.38, 139.39, 138.78, 135.48, 134.92, 131.55, 131.24, 130.45, 130.31, 129.52, 129.42, 128.42, 128.28, 128.01, 127.42, 127.18, 126.89, 126.43, 59.33, 54.60, 51.46, 47.26, 37.96, 33.57, 21.70. HRMS (<i>m/z</i>): [M + H]<sup>+</sup>, calcd for C<sub>28</sub>H<sub>28</sub>BrN<sub>2</sub>O<sub>4</sub>S, 567.0948; found, 567.0962.</p>                                                                                                                                 |
|  | <p><b>4-Chloro-N-(2-((N-(2-hydroxyethyl)-4-methylphenyl)sulfonamido)benzyl)-N-methylbenzamide (53)</b></p> <p>This compound was prepared by the same procedure for <b>6</b> and was purified with a gradient silica gel column chromatography from EtOAc/Hexane 1:1 to EtOAc/Hexane 7:3 affording a white powder (101 mg, 93%). <sup>1</sup>H NMR (500 MHz, DMSO-<i>d</i><sub>6</sub>) δ ppm 7.48 - 7.64 (m, 3.5 H), 7.34 - 7.48 (m, 5.5 H), 7.24 - 7.34 (m, 1 H), 7.19 (t, <i>J</i>=7.5 Hz, 1 H), 6.44 - 6.61 (m, 1 H), 4.94 - 5.11 (m, 0.5 H), 4.74 - 4.94 (m, 1.5 H), 4.60 - 4.74 (m, 1 H), 3.67 - 3.92 (m, 1 H), 3.37 - 3.48 (m, 1 H), 3.25 - 3.37 (m, 1 H), 3.05 - 3.25 (m, 1 H), 2.73 - 2.95 (m, 3 H), 2.29 - 2.45 (m, 3 H). <sup>13</sup>C NMR (100 MHz, DMSO-<i>d</i><sub>6</sub>) δ ppm 170.77, 170.42, 144.17, 139.05, 138.84, 138.48, 138.17, 135.59, 135.40, 135.10, 134.80, 134.63, 130.23, 129.47, 129.37, 129.15, 128.97, 128.33, 128.17, 128.02, 127.94, 127.16, 126.89, 59.03, 54.26, 51.25, 47.03, 37.63, 33.31, 21.53. HRMS (<i>m/z</i>): [M + H]<sup>+</sup>, calcd for C<sub>24</sub>H<sub>26</sub>N<sub>2</sub>O<sub>4</sub>S, 473.1296; found, 473.1305.</p>                                                                                                                                                                   |
|  | <p><b>N-(2-((Benzyl(methyl)amino)methyl)phenyl)-N-(2-hydroxyethyl)-4-(trifluoromethyl)benzenesulfonamide (54)</b></p> <p>This compound was prepared by the same procedure for <b>12</b> and was purified with a gradient silica gel column chromatography from EtOAc/Hexane 1:1 to EtOAc/Hexane 1:0 affording an off yellow powder (98 mg, 35%). <sup>1</sup>H NMR (500 MHz, CDCl<sub>3</sub>) δ ppm 7.65 - 7.81 (m, 4 H), 7.37 - 7.46 (m, 4 H), 7.24 - 7.37 (m, 4 H), 7.18 (td, <i>J</i>=7.6, 1.5 Hz, 1 H), 6.37 (d, <i>J</i>=7.8 Hz, 1 H), 4.83 - 5.05 (m, 1 H), 4.02 - 4.23 (m, 1 H), 3.79 - 3.97 (m, 1 H), 3.64 - 3.74 (m, 1 H), 3.57 - 3.64 (m, 1 H), 3.23 - 3.35 (m, 1 H), 3.05 - 3.20 (m, 1 H), 2.91 (s, 1 H), 2.14 (s, 3 H). <sup>13</sup>C NMR (125 MHz, CDCl<sub>3</sub>) δ ppm 140.61, 139.56, 139.36, 135.80, 134.70, 134.18, 130.57, 129.15, 129.04, 128.66, 128.60, 127.94, 127.36, 126.15, 126.12, 124.53, 122.36, 63.49, 59.38, 59.15, 56.12, 41.43. HRMS (<i>m/z</i>): [M + H]<sup>+</sup>, calcd for C<sub>24</sub>H<sub>26</sub>N<sub>2</sub>O<sub>3</sub>S, 479.1611; found, 479.1617.</p>                                                                                                                                                                                                                                        |

|                                                                                     |                                                                                                                                                                                                                                                                                                                                                                                                                                                                                                                                                                                                                                                                                                                                                                                                                                                                                                                                                                                                                                                                                                                                                                                                                                                       |
|-------------------------------------------------------------------------------------|-------------------------------------------------------------------------------------------------------------------------------------------------------------------------------------------------------------------------------------------------------------------------------------------------------------------------------------------------------------------------------------------------------------------------------------------------------------------------------------------------------------------------------------------------------------------------------------------------------------------------------------------------------------------------------------------------------------------------------------------------------------------------------------------------------------------------------------------------------------------------------------------------------------------------------------------------------------------------------------------------------------------------------------------------------------------------------------------------------------------------------------------------------------------------------------------------------------------------------------------------------|
| 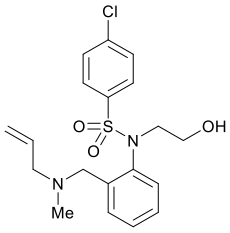   | <p><b><i>N</i>-(2-((Allyl(methyl)amino)methyl)phenyl)-4-chloro-<i>N</i>-(2-hydroxyethyl)benzenesulfonamide (55)</b></p> <p>This compound was prepared by the same procedure for <b>12</b> and was purified with a gradient silica gel column chromatography from EtOAc/Hexane 1:1 to EtOAc/Hexane 1:0 affording a white powder (306 mg, 91%). <sup>1</sup>H NMR (500 MHz, CDCl<sub>3</sub>) δ ppm 7.46 - 7.53 (m, 2 H), 7.41 (dd, <i>J</i>=8.9, 2.1 Hz, 2 H), 7.24 - 7.29 (m, 1 H), 7.19 - 7.24 (m, 1 H), 7.12 (td, <i>J</i>=7.6, 1.6 Hz, 1 H), 6.37 (d, <i>J</i>=7.8 Hz, 1 H), 5.86 - 6.04 (m, 1 H), 5.12 - 5.25 (m, 2 H), 4.82 (d, <i>J</i>=12.2 Hz, 1 H), 3.93 - 4.05 (m, 1 H), 3.44 - 3.61 (m, 1 H), 3.09 - 3.24 (m, 2 H), 2.92 - 3.08 (m, 2 H), 2.74 - 2.86 (m, 1 H), 2.12 (s, 3 H). <sup>13</sup>C NMR (125 MHz, CDCl<sub>3</sub>) δ ppm 139.71, 139.58, 139.47, 135.50, 133.94, 133.88, 130.03, 129.33, 129.01, 128.47, 127.28, 119.60, 61.19, 59.06, 59.00, 55.93, 41.58. HRMS (<i>m/z</i>): [M + H]<sup>+</sup>, calcd for C<sub>19</sub>H<sub>24</sub>ClN<sub>2</sub>O<sub>3</sub>S, 395.1191; found, 395.1215.</p>                                                                                                                         |
|    | <p><b><i>N</i>-(2-((Allyl(isopropyl)amino)methyl)phenyl)-<i>N</i>-(2-hydroxyethyl)-4-methoxybenzenesulfonamide (56)</b></p> <p>This compound was prepared by the same procedure for <b>12</b> and was purified with a gradient silica gel column chromatography from EtOAc/Hexane 1:1 to EtOAc/Hexane 1:0 affording a white powder (202 mg, 48%). <sup>1</sup>H NMR (500 MHz, CDCl<sub>3</sub>) δ ppm 7.47 - 7.59 (m, 2 H), 7.32 (d, <i>J</i>=7.6 Hz, 1 H), 7.19 - 7.29 (m, 2 H), 7.09 - 7.19 (m, 1 H), 6.86 - 7.02 (m, 2 H), 6.38 (d, <i>J</i>=8.1 Hz, 1 H), 5.85 - 6.03 (m, 1 H), 5.10 - 5.25 (m, 2 H), 4.91 (d, <i>J</i>=12.5 Hz, 1 H), 3.99 - 4.17 (m, 1 H), 3.88 (d, <i>J</i>=1.2 Hz, 3 H), 3.57 - 3.71 (m, 1 H), 3.18 - 3.34 (m, 2 H), 3.09 - 3.18 (m, 1 H), 2.95 - 3.09 (m, 2 H), 2.81 - 2.95 (m, 1 H), 1.34 (d, <i>J</i>=6.6 Hz, 3 H), 1.08 (d, <i>J</i>=6.6 Hz, 3 H). <sup>13</sup>C NMR (125 MHz, CDCl<sub>3</sub>) δ ppm 163.34, 140.13, 135.20, 134.28, 130.84, 128.63, 127.57, 128.52, 128.03, 118.45, 114.08, 59.17, 55.84, 55.75, 53.25, 50.63, 49.79, 20.46, 14.04. HRMS (<i>m/z</i>): [M + H]<sup>+</sup>, calcd for C<sub>22</sub>H<sub>31</sub>N<sub>2</sub>O<sub>4</sub>S, 419.1999; found, 419.2021.</p>                         |
|  | <p><b><i>N</i>-(2-((Allyl(methyl)amino)methyl)phenyl)-<i>N</i>-(2-hydroxyethyl)-4-methylbenzenesulfonamide (57)</b></p> <p>This compound was prepared by the same procedure for <b>12</b> and was purified with a gradient silica gel column chromatography from EtOAc/Hexane 1:1 to EtOAc/Hexane 1:0 affording an off-white powder (95 mg, 33%). <sup>1</sup>H NMR (500 MHz, CDCl<sub>3</sub>) δ ppm 7.54 (br. s., 1 H), 7.51 (d, <i>J</i>=8.1 Hz, 2 H), 7.21 - 7.33 (m, 4 H), 7.17 (td, <i>J</i>=7.6, 1.7 Hz, 1 H), 6.44 (d, <i>J</i>=7.8 Hz, 1 H), 5.94 - 6.15 (m, 1 H), 5.28 (s, 1 H), 5.25 (d, <i>J</i>=4.9 Hz, 1 H), 4.91 (d, <i>J</i>=12.2 Hz, 1 H), 3.94 - 4.12 (m, 1 H), 3.56 - 3.76 (m, 1 H), 3.16 - 3.39 (m, 2 H), 2.97 - 3.15 (m, 2 H), 2.76 - 2.96 (m, 1 H), 2.45 (s, 3 H), 2.19 (s, 3 H). <sup>13</sup>C NMR (125 MHz, CDCl<sub>3</sub>) δ ppm 143.99, 140.12, 139.66, 134.17, 134.03, 133.73, 129.61, 128.84, 128.75, 128.18, 127.54, 119.56, 61.24, 59.47, 59.17, 55.98, 41.60, 21.80. HRMS (<i>m/z</i>): [M + H]<sup>+</sup>, calcd for C<sub>20</sub>H<sub>27</sub>N<sub>2</sub>O<sub>3</sub>S, 375.1742; found, 375.1767.</p>                                                                                                      |
|  | <p><b>(<i>E</i>)-<i>N</i>-(3-(4-Chlorophenyl)allyl)-2-((<i>N</i>-(2-hydroxyethyl)-4-methylphenyl)sulfonamido)-<i>N</i>-methylbenzamide (58)</b></p> <p>This compound was prepared by the same procedure for <b>6</b> starting from anthranilic acid and was purified with a gradient silica gel column chromatography from EtOAc/Hexane 7:3 to EtOAc/Hexane 1:0 affording white flakes (95 mg, 29%). <sup>1</sup>H NMR (500 MHz, DMSO-<i>d</i><sub>6</sub>) δ ppm 7.33 - 7.57 (m, 11 H), 6.57 - 6.84 (m, 2 H), 6.22 - 6.51 (m, 1 H), 5.24 - 5.47 (m, 1 H), 4.33 - 4.57 (m, 1 H), 3.99 - 4.23 (m, 1 H), 3.71 - 3.92 (m, 1 H), 3.36 - 3.48 (m, 1 H), 3.11 - 3.31 (m, 2 H), 3.00 (s, 1.5 H), 2.95 (s, 1.5 H), 2.39 (d, <i>J</i>=3.9 Hz, 3 H). <sup>13</sup>C NMR (100 MHz, DMSO-<i>d</i><sub>6</sub>) δ ppm 170.23, 169.89, 144.47, 138.49, 138.38, 137.16, 137.10, 136.35, 135.98, 135.15, 135.00, 132.84, 132.53, 131.92, 130.97, 130.87, 130.44, 130.36, 129.30, 129.23, 128.97, 128.89, 128.83, 128.78, 128.63, 128.47, 128.42, 128.11, 126.97, 126.04, 59.16, 54.91, 54.22, 49.16, 37.89, 32.89, 21.75. HRMS (<i>m/z</i>): [M + H]<sup>+</sup>, calcd for C<sub>26</sub>H<sub>28</sub>ClN<sub>2</sub>O<sub>4</sub>S, 499.1453; found, 499.1471.</p> |

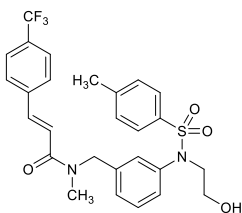

**(E)-N-(3-((N-(2-Hydroxyethyl)-4-methylphenyl)sulfonamido)benzyl)-N-methyl-3-(4-(trifluoromethyl)phenyl)acrylamide (59)**

This compound was prepared by the same procedure for **6** starting from 3-aminobenzyl alcohol and was purified with a gradient silica gel column chromatography from EtOAc/Hexane 7:3 to EtOAc/Hexane 1:0 affording an off-white powder (78 mg, 68%). <sup>1</sup>H NMR (500 MHz, DMSO-*d*<sub>6</sub>) δ ppm 7.97 (d, *J*=8.1 Hz, 1 H), 7.89 (d, *J*=8.1 Hz, 1 H), 7.76 (d, *J*=8.1 Hz, 1 H), 7.71 (d, *J*=8.3 Hz, 1 H), 7.59 (t, *J*=15.0 Hz, 1 H), 7.36 - 7.47 (m, 3 H), 7.25 - 7.36 (m, 3 H), 7.14 - 7.25 (m, 1 H), 7.01 (d, *J*=5.4 Hz, 1 H), 6.80 - 6.92 (m, 1 H), 4.65 - 4.86 (m, 2 H), 4.56 (s, 1 H), 3.45 - 3.65 (m, 2 H), 3.25 - 3.42 (m, 2 H), 3.04 (s, 1.5 H), 2.83 (s, 1.5 H), 2.31 (s, 1.5 H), 2.27 (s, 1.5 H). <sup>13</sup>C NMR (100 MHz, DMSO-*d*<sub>6</sub>) δ ppm 166.16, 140.50, 140.41, 140.33, 139.86, 139.63, 139.29, 135.89, 135.78, 130.29, 129.98, 129.89, 129.78, 129.41, 129.33, 128.31, 128.24, 128.05, 127.96, 127.88, 127.42, 127.09, 126.31, 126.27, 126.23, 126.18, 123.48, 122.02, 121.95, 59.54, 59.48, 53.33, 52.66, 50.67, 35.39, 34.47, 21.63, 140.64, 144.03, 144.07, 165.98, HRMS (*m/z*): [M + H]<sup>+</sup>, calcd for C<sub>27</sub>H<sub>28</sub>F<sub>3</sub>N<sub>2</sub>O<sub>4</sub>S, 533.1716; found, 533.1701.

**(E)-N-(2-((N-(2-Hydroxyethyl)-4-methylphenyl)sulfonamido)benzyl)-N-methyl-3-(4-(trifluoromethyl)phenyl)acrylamide (6)**

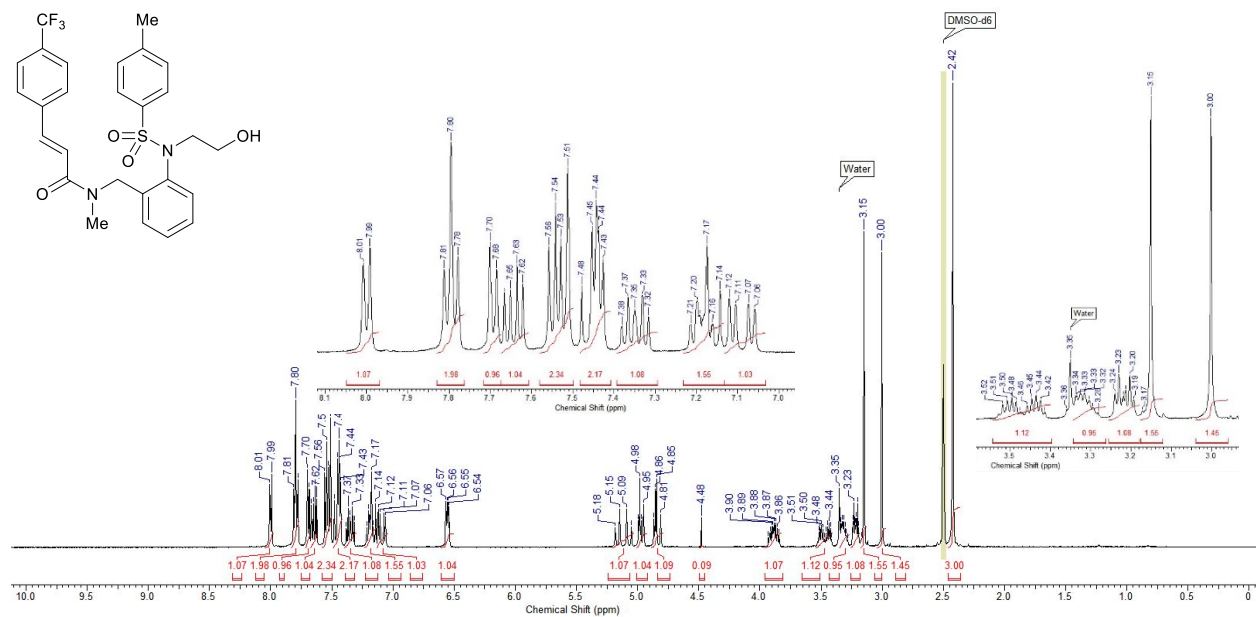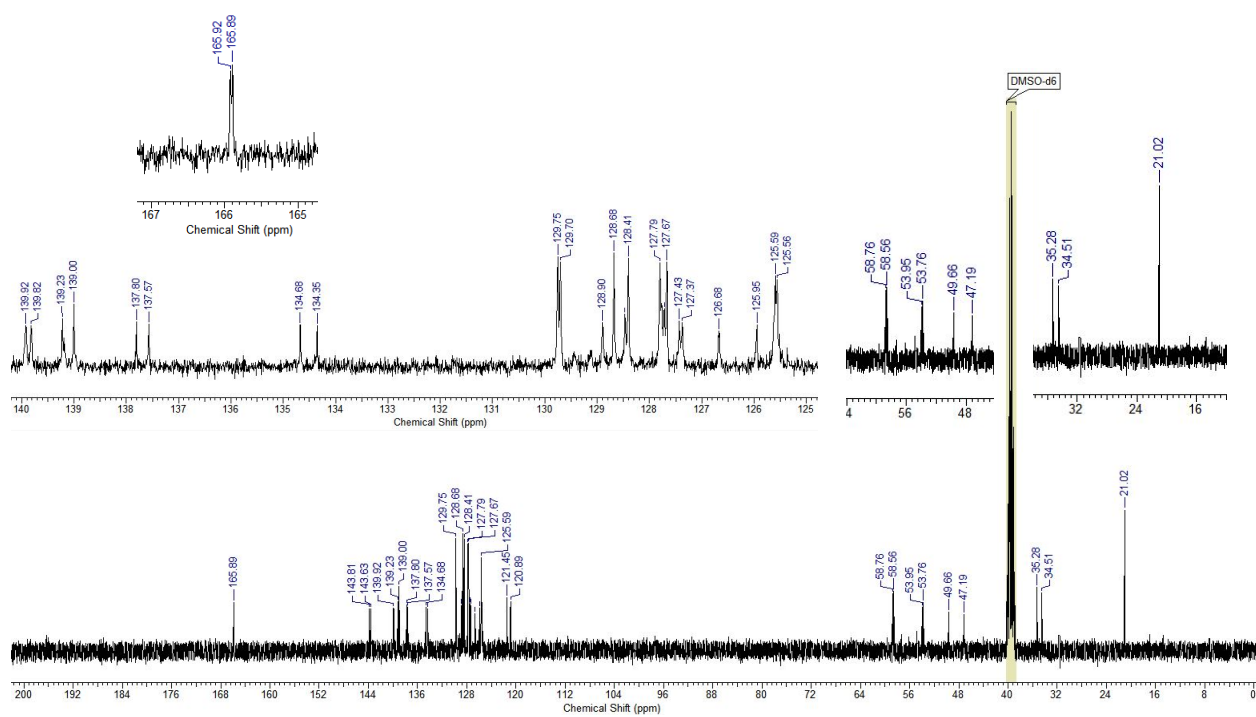





**(E)-N-(2-((4-Ethyl-N-(2-hydroxyethyl)phenyl)sulfonamido)benzyl)-N-methyl-3-(4-(trifluoromethyl)phenyl)acrylamide (13)**

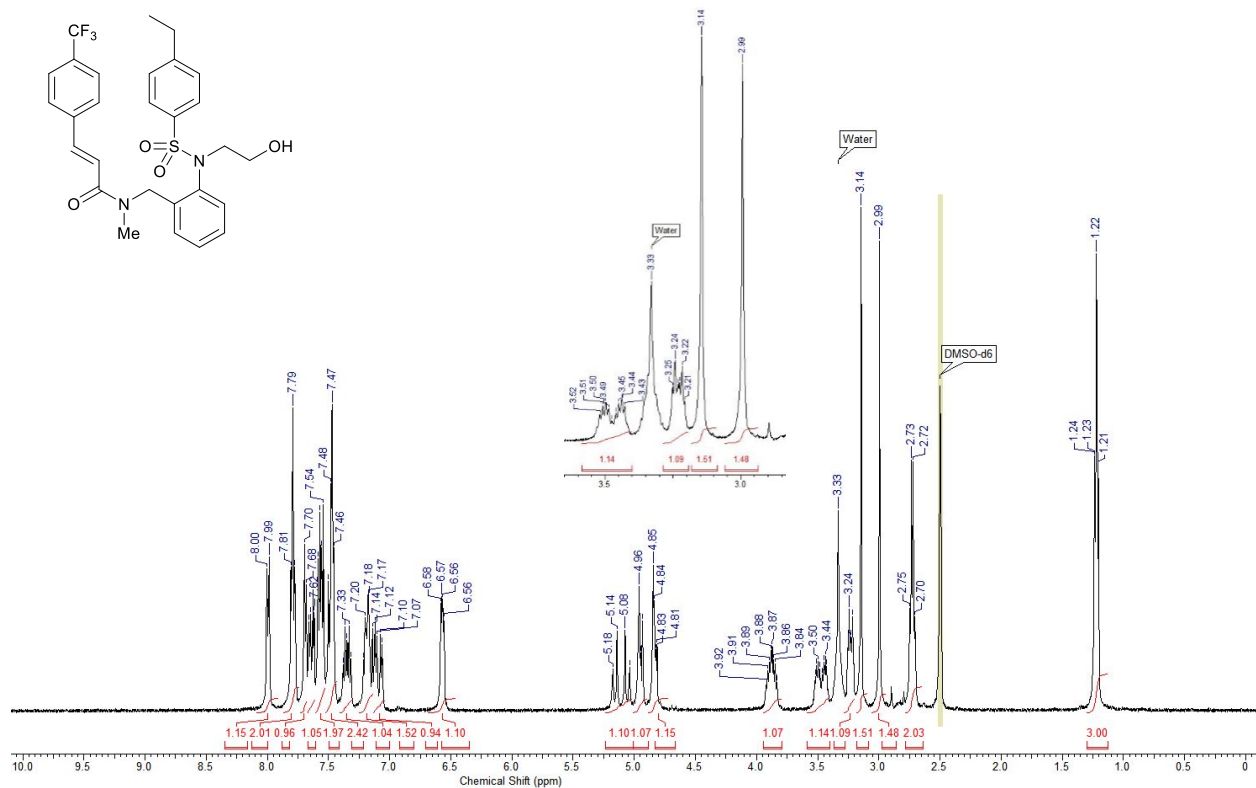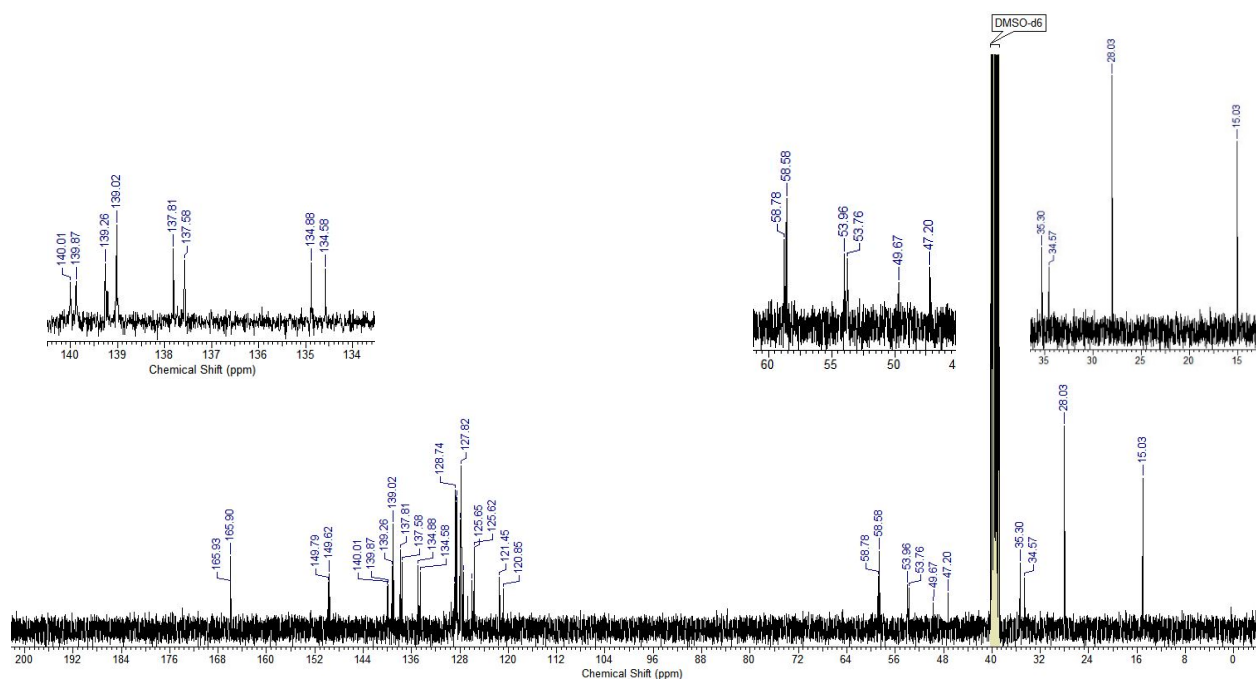

**(E)-N-(2-((3-Fluoro-N-(2-hydroxyethyl)-4-methylphenyl)sulfonamido)benzyl)-N-methyl-3-(4-(trifluoromethyl)phenyl)acrylamide (14)**

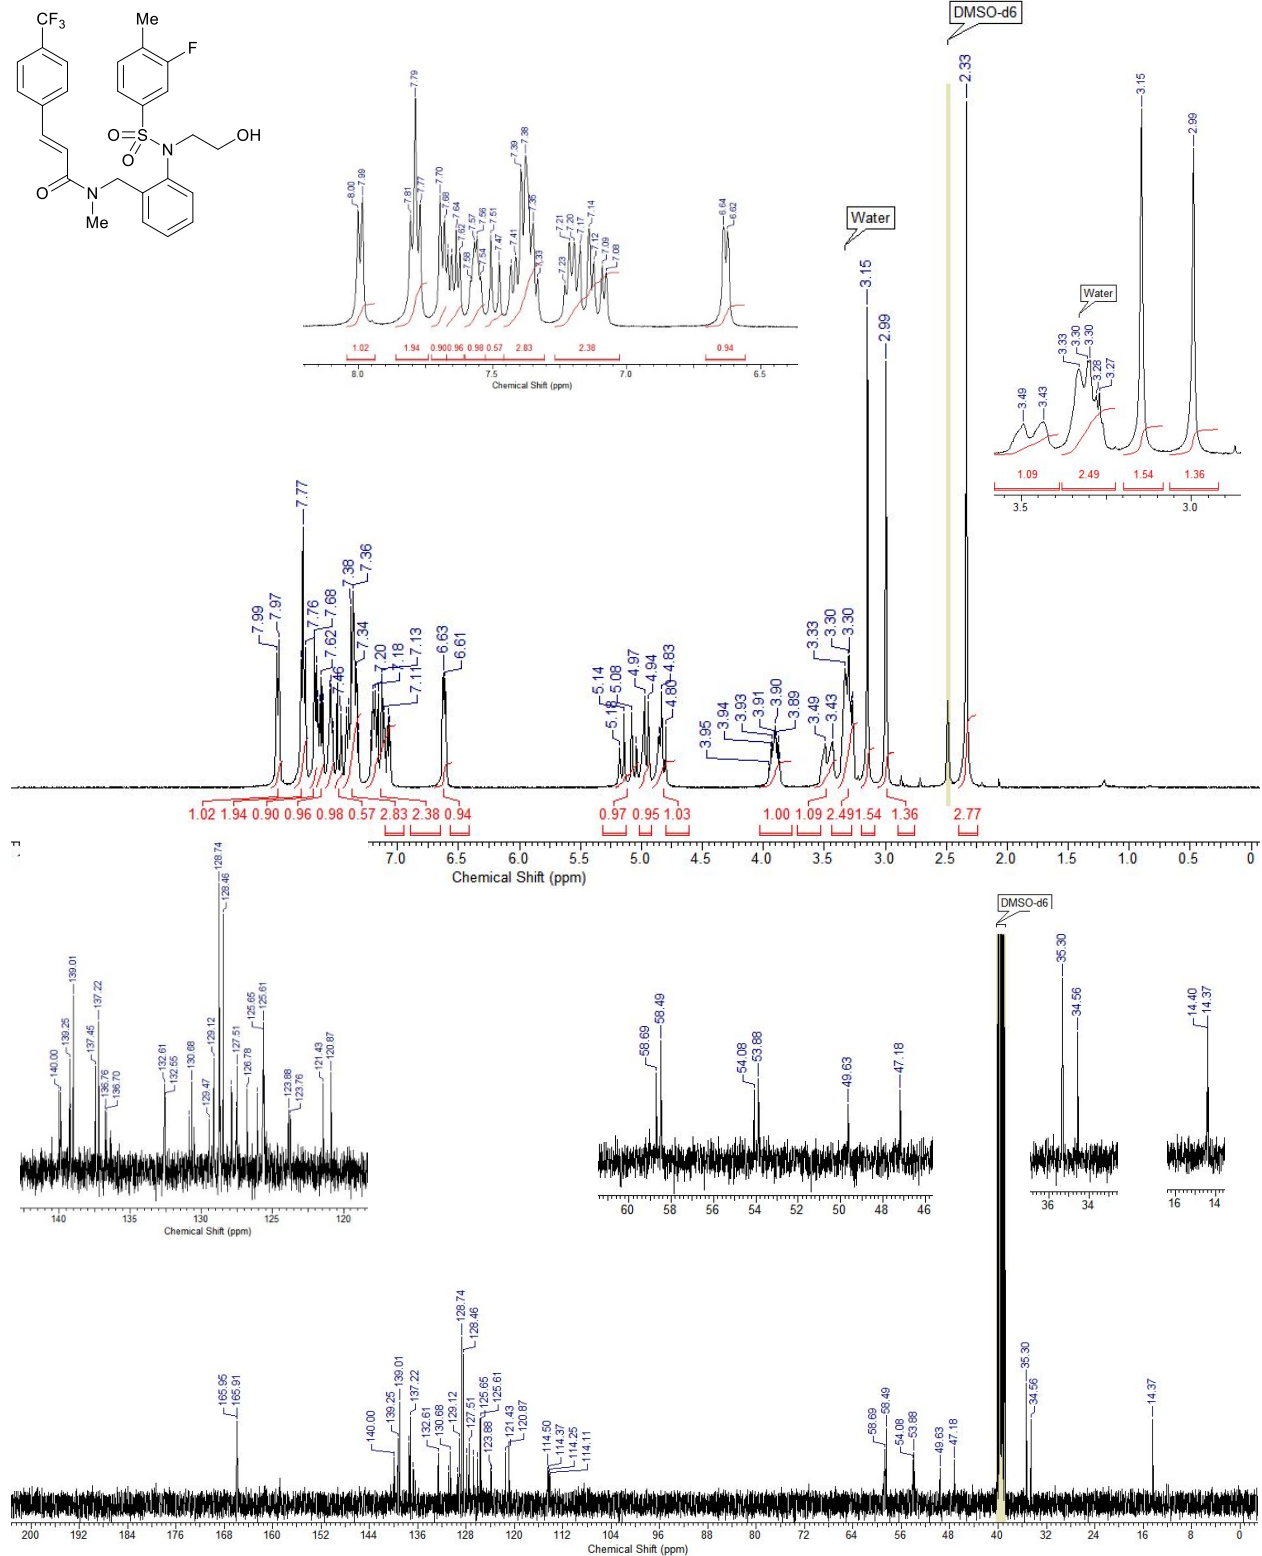

**(E)-N-(2-(N-(2-Hydroxyethyl)phenylsulfonamido)benzyl)-N-methyl-3-(4-(trifluoromethyl)phenyl)acrylamide (15)**

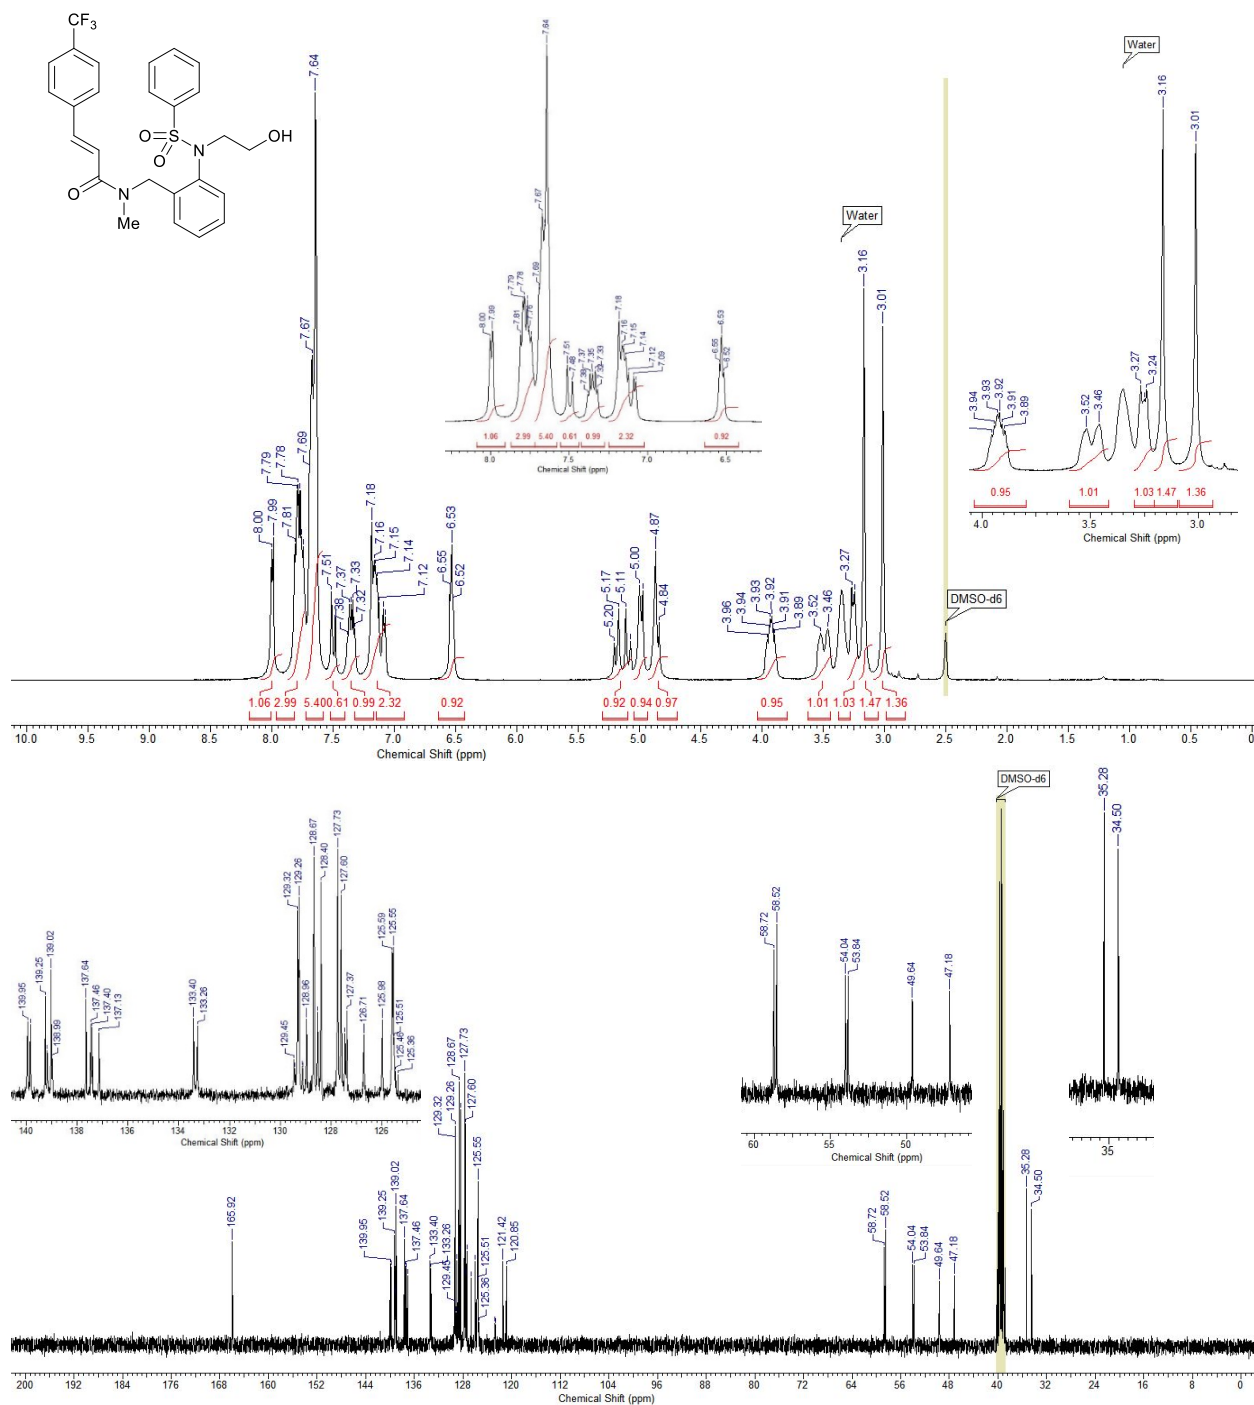

**(E)-3-(4-Chlorophenyl)-N-2-((N-(2-hydroxyethyl)-4-methylphenyl)sulfonamido)benzyl)-N-methylacrylamide (16)**

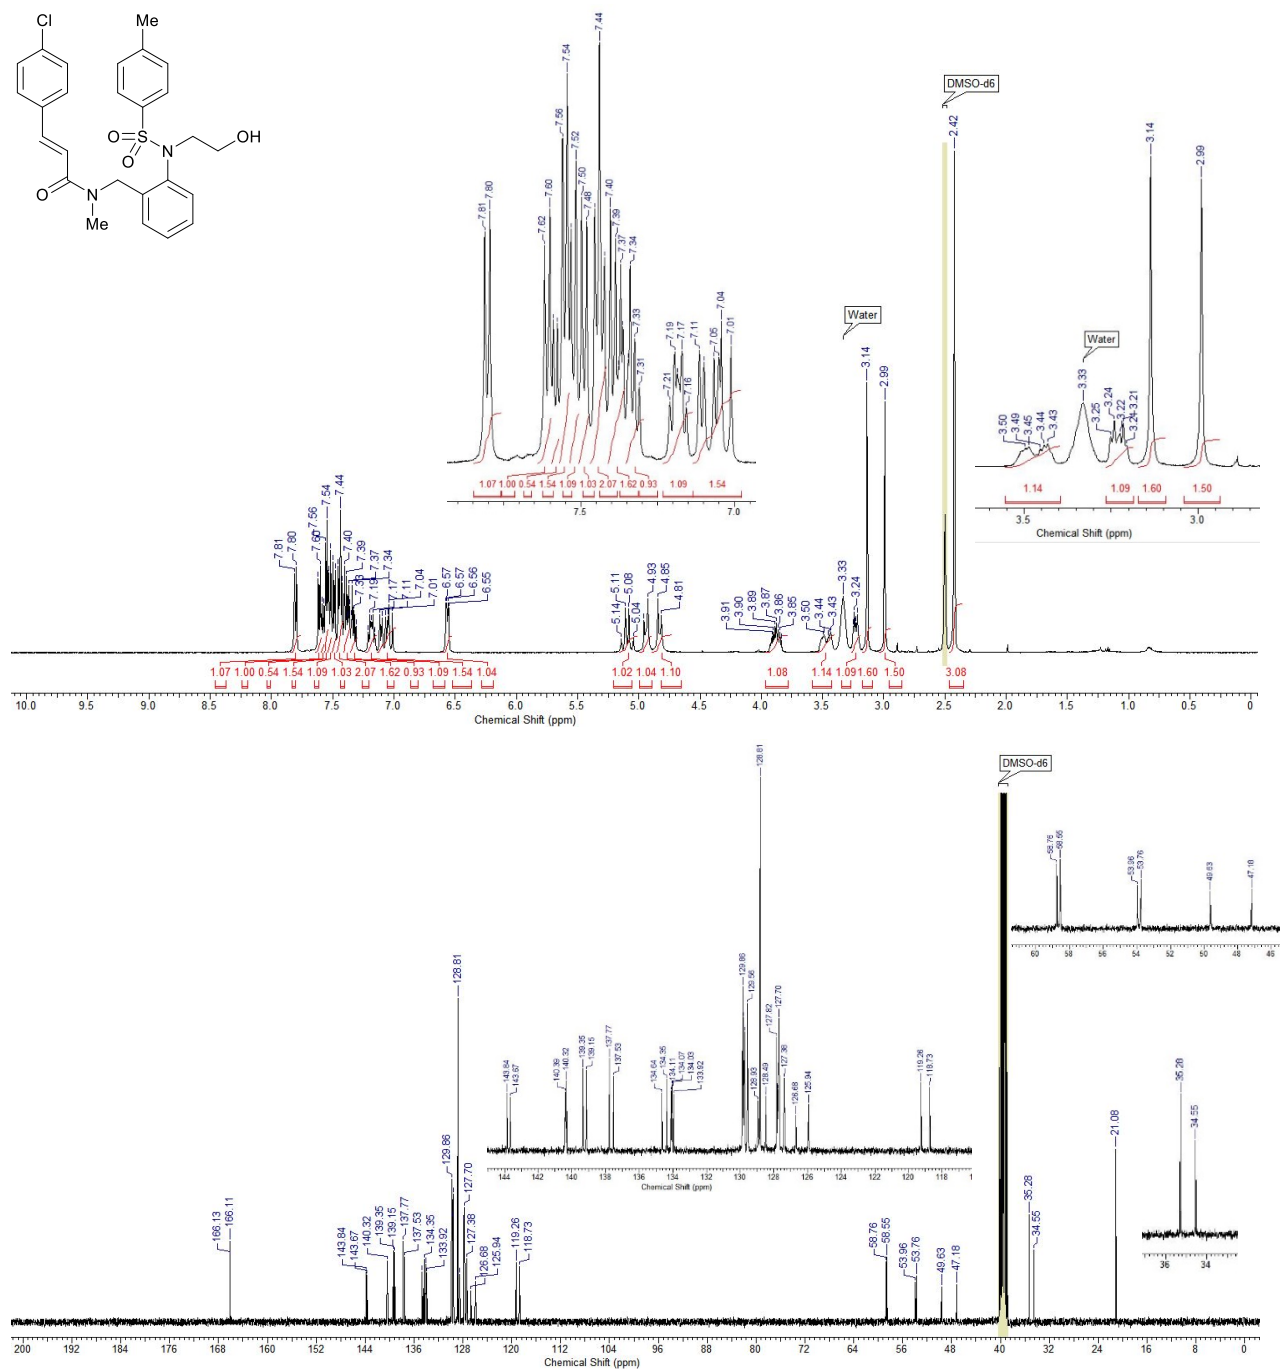

Supplement: c8md00479j1.pdf [file c8md00479j1.pdf]
